# Supplementary material
Source: PubMed Central journal article supplement (PMC3616412)
Supplement: Supp_Data.pdf [file Supp_Data.pdf]

## Supplementary Data

SUPPLEMENTARY TABLE S1. HUMAN PUTATIVE CANDIDATE OOCYTE REPROGRAMMING FACTORS (CORFs)

| <i>Gene ID</i>  | <i>Gene identifier</i> | <i>UG cluster</i> | <i>Fold change</i> | <i>p value</i> |
|-----------------|------------------------|-------------------|--------------------|----------------|
| <i>A1CF</i>     | NM_014576              | Hs.499643         | 9.83               | 0.007813       |
| <i>AFAP1L2</i>  | AW138743               | Hs.501106         | 5.54               | 0.009327       |
| <i>AFF4</i>     | AV652437               | Hs.519313         | 4.54               | 0.016167       |
| <i>AKIRIN2</i>  | BC000764               | Hs.485915         | 9.13               | 5.20E-10       |
| <i>AOF1</i>     | BE348688               | Hs.709336         | 121.98             | 1.10E-05       |
| <i>ARID2</i>    | AI692432               | Hs.317304         | 19.15              | 0.009654       |
| <i>ARID5B</i>   | BU171496               | Hs.535297         | 8.95               | 0.020919       |
| <i>ASF1A</i>    | NM_014034              | Hs.292316         | 6.57               | 0.012035       |
| <i>ASF1B</i>    | NM_018154              | Hs.26516          | 3.95               | 0.027946       |
| <i>ASXL1</i>    | AI829840               | Hs.374043         | 13.26              | 0.002342       |
| <i>ASZ1</i>     | BC034963               | Hs.352412         | 15.05              | 0.00918        |
| <i>ATXN1</i>    | BF438383               | Hs.712106         | 4.76               | 0.021963       |
| <i>BACH1</i>    | NM_001186              | Hs.154276         | 14.99              | 0.001947       |
| <i>BANP</i>     | NM_017869              | Hs.461705         | 8.67               | 1.34E-05       |
| <i>BATF2</i>    | AW083820               | Hs.124840         | 12.92              | 0.008916       |
| <i>BAZ1A</i>    | NM_013448              | Hs.509140         | 29.62              | 0.00716        |
| <i>BCL11B</i>   | AA918317               | Hs.709690         | 12.35              | 0.015048       |
| <i>BHLHE40</i>  | NM_003670              | Hs.719093         | 31.29              | 5.43E-06       |
| <i>BNC1</i>     | NM_001717              | Hs.459153         | 18.24              | 0.031192       |
| <i>BRD1</i>     | NM_014577              | Hs.127950         | 3.59               | 2.04E-05       |
| <i>BRDT</i>     | NM_001726              | Hs.482520         | 7.6                | 0.033059       |
| <i>BRPF1</i>    | NM_004634              | Hs.1004           | 7.54               | 0.019201       |
| <i>BTRC</i>     | BC006204               | Hs.643802         | 3.37               | 0.037096       |
| <i>C17orf79</i> | AJ272196               | Hs.462729         | 4.38               | 0.000202       |
| <i>C1orf149</i> | NM_022756              | Hs.17118          | 3.97               | 0.001208       |
| <i>C1orf59</i>  | BE502436               | Hs.7962           | 24.14              | 0.000361       |
| <i>C21orf45</i> | AW151538               | Hs.190518         | 6.74               | 0.005698       |
| <i>CAMK2A</i>   | NM_015981              | Hs.716391         | 7.84               | 0.049556       |
| <i>CAMTA1</i>   | AF111804               | Hs.397705         | 5.01               | 0.016866       |
| <i>CBFA2T3</i>  | NM_005187              | Hs.513811         | 5.32               | 0.004634       |
| <i>CBX8</i>     | NM_020649              | Hs.387258         | 8.28               | 0.016357       |
| <i>CBY1</i>     | NM_015373              | Hs.334911         | 3.26               | 0.003414       |
| <i>CCNE1</i>    | AI671049               | Hs.244723         | 17.62              | 0.001994       |
| <i>CDC45L</i>   | NM_003504              | Hs.474217         | 5.08               | 0.028999       |
| <i>CDK7</i>     | L20320                 | Hs.184298         | 12.23              | 4.30E-05       |
| <i>CDKN2A</i>   | NM_000077              | Hs.512599         | 4.14               | 0.044969       |
| <i>CENPP</i>    | AA766264               | Hs.713775         | 5.52               | 0.018495       |
| <i>CIITA</i>    | U31931                 | Hs.701991         | 4.19               | 0.036814       |
| <i>CLOCK</i>    | NM_004898              | Hs.436975         | 8.21               | 0.038533       |
| <i>CNOT6</i>    | AA633196               | Hs.654984         | 10.74              | 5.87E-06       |
| <i>CNOT6L</i>   | AW514857               | Hs.592519         | 14.69              | 0.005453       |
| <i>CNOT7</i>    | W94952                 | Hs.719129         | 4.09               | 0.003765       |
| <i>CNOT8</i>    | NM_004779              | Hs.26703          | 4.39               | 0.000414       |
| <i>CPEB2</i>    | AI202327               | Hs.656937         | 17.37              | 0.043742       |
| <i>CREB5</i>    | NM_004904              | Hs.437075         | 14.74              | 0.0002         |
| <i>CRKRS</i>    | NM_016507              | Hs.416108         | 5.58               | 0.018682       |
| <i>CSDE1</i>    | AA167775               | Hs.69855          | 4.8                | 0.005164       |
| <i>CTCF</i>     | NM_080618              | Hs.131543         | 55.82              | 0.002403       |
| <i>CUX1</i>     | BE046521               | Hs.654389         | 15.75              | 2.87E-05       |
| <i>CYLD</i>     | BE046443               | Hs.578973         | 6.06               | 0.038044       |
| <i>DAB2</i>     | BC026261               | Hs.481980         | 5.87               | 0.020987       |
| <i>DAB2IP</i>   | AB051530               | Hs.522378         | 4.11               | 0.002471       |
| <i>DLX4</i>     | NM_001934              | Hs.591167         | 3.13               | 0.011546       |
| <i>DLX6</i>     | NM_005222              | Hs.249196         | 6.66               | 0.000565       |
| <i>DMRT1</i>    | NM_021951              | Hs.98586          | 3.91               | 0.010175       |
| <i>DMRT2</i>    | AF284225               | Hs.59506          | 3.71               | 0.015309       |
| <i>DMRTB1</i>   | AI198850               | Hs.131654         | 205.78             | 0.000701       |
| <i>DND1</i>     | A1949010               | Hs.591262         | 5.86               | 0.001094       |

(continued)

SUPPLEMENTARY TABLE S1. (CONTINUED)

| <i>Gene ID</i>  | <i>Gene identifier</i> | <i>UG cluster</i> | <i>Fold change</i> | <i>p value</i> |
|-----------------|------------------------|-------------------|--------------------|----------------|
| <i>DNMT1</i>    | NM_001379              | Hs.202672         | 12.69              | 0.000558       |
| <i>DPF3</i>     | AI125562               | Hs.162868         | 3.74               | 0.021744       |
| <i>DPPA3</i>    | AI066520               | Hs.131358         | 369.73             | 6.06E-06       |
| <i>DPPA5</i>    | AI365263               | Hs.125331         | 457.32             | 4.65E-09       |
| <i>DVL2</i>     | AW016304               | Hs.118640         | 10.49              | 0.013597       |
| <i>EBF1</i>     | AF208502               | Hs.573143         | 129.58             | 0.011163       |
| <i>EDA</i>      | AF061193               | Hs.105407         | 17.39              | 0.009245       |
| <i>EHF</i>      | AI763378               | Hs.653859         | 14.55              | 0.022372       |
| <i>EIF3B</i>    | AW207523               | Hs.371001         | 3.7                | 0.047909       |
| <i>EIF5B</i>    | AB018284               | Hs.158688         | 5.92               | 0.04986        |
| <i>ELA1</i>     | NM_001971              | Hs.348395         | 8.91               | 0.000454       |
| <i>ELK3</i>     | AW575374               | Hs.46523          | 3.35               | 0.006433       |
| <i>EN1</i>      | NM_001426              | Hs.271977         | 7.63               | 0.028205       |
| <i>EPAS1</i>    | AF052094               | Hs.468410         | 56.07              | 5.75E-05       |
| <i>EPB41L5</i>  | AI652872               | Hs.654802         | 14.18              | 2.33E-05       |
| <i>ERCC6</i>    | BF433475               | Hs.654449         | 11.44              | 0.005305       |
| <i>ERG</i>      | M21535                 | Hs.473819         | 6.63               | 0.001026       |
| <i>ESR1</i>     | AF258450               | Hs.208124         | 11.2               | 0.013301       |
| <i>ESR2</i>     | AF051428               | Hs.660607         | 3.29               | 0.036548       |
| <i>ESRRB</i>    | AK096020               | Hs.435845         | 3.68               | 0.035991       |
| <i>ETV5</i>     | AW206458               | Hs.43697          | 57.01              | 0.009912       |
| <i>EVII</i>     | AI458437               | Hs.719216         | 5.43               | 0.046048       |
| <i>EVX1</i>     | NM_001989              | Hs.369879         | 3.26               | 0.023439       |
| <i>EYA2</i>     | U71207                 | Hs.472877         | 5.81               | 0.004916       |
| <i>FOSB</i>     | NM_006732              | Hs.590958         | 14.38              | 0.003192       |
| <i>FOSL2</i>    | N36408                 | Hs.220971         | 4.63               | 0.030959       |
| <i>FOXA2</i>    | AI693985               | Hs.155651         | 5.2                | 0.048186       |
| <i>FOXD2</i>    | NM_004474              | Hs.166188         | 7.08               | 0.012445       |
| <i>FOXF2</i>    | NM_001452              | Hs.484423         | 4.38               | 0.048442       |
| <i>FO XK1</i>   | AW007319               | Hs.708095         | 3.35               | 0.007514       |
| <i>FO XK2</i>   | N49941                 | Hs.591140         | 14.4               | 0.011654       |
| <i>FO XN4</i>   | AF425597               | Hs.528316         | 3.13               | 0.014351       |
| <i>FO XO3</i>   | BE888885               | Hs.220950         | 6.97               | 0.001127       |
| <i>FO XP2</i>   | AF493430               | Hs.656280         | 10.3               | 0.004578       |
| <i>FO XP4</i>   | BE504097               | Hs.131436         | 3.25               | 0.039341       |
| <i>FO XQ1</i>   | AI676059               | Hs.591352         | 17.26              | 0.00426        |
| <i>FO XR1</i>   | AA669512               | Hs.116679         | 206.91             | 0.003052       |
| <i>FTSJD2</i>   | D43949                 | Hs.520102         | 6.94               | 1.33E-05       |
| <i>GAS7</i>     | BE439987               | Hs.462214         | 12.54              | 0.028999       |
| <i>GATA2</i>    | BC002557               | Hs.367725         | 3.22               | 0.036318       |
| <i>GATA4</i>    | D78260                 | Hs.243987         | 4.65               | 0.011957       |
| <i>GCM1</i>     | AB026493               | Hs.28346          | 3.81               | 0.028867       |
| <i>GFI1</i>     | NM_005263              | Hs.73172          | 19.22              | 0.014098       |
| <i>GFI1B</i>    | AI097490               | Hs.553160         | 4.91               | 0.020104       |
| <i>GLP-1</i>    | AI923985               | Hs.709296         | 5.31               | 0.042809       |
| <i>GRIP1</i>    | BE672408               | Hs.505946         | 6.42               | 0.024859       |
| <i>GRM5</i>     | D60132                 | Hs.719168         | 3.87               | 0.011318       |
| <i>GTF2A1L</i>  | NM_006873              | Hs.44385          | 150.01             | 0.000623       |
| <i>GTF2B</i>    | NM_001514              | Hs.481852         | 10.48              | 0.006302       |
| <i>H1FOO</i>    | NM_153833              | Hs.97358          | 318.44             | 0.026501       |
| <i>H2AFB2</i>   | AI218431               | Hs.534498         | 3.03               | 0.025565       |
| <i>H2AFY</i>    | BI560542               | Hs.599225         | 3.55               | 0.026797       |
| <i>HBP1</i>     | AF019214               | Hs.162032         | 3.97               | 0.002576       |
| <i>HBZ</i>      | NM_005332              | Hs.585357         | 4.45               | 0.031805       |
| <i>HCFC2</i>    | AW956392               | Hs.506558         | 6.38               | 0.000475       |
| <i>HDAC9</i>    | BM726008               | Hs.196054         | 56.05              | 0.001492       |
| <i>HES6</i>     | AW249678               | Hs.42949          | 10.48              | 0.044439       |
| <i>HEY2</i>     | AF232238               | Hs.144287         | 6.09               | 0.004236       |
| <i>HHEX</i>     | Z21533                 | Hs.118651         | 40.15              | 0.006371       |
| <i>HIC2</i>     | AI912206               | Hs.632767         | 7.7                | 0.000121       |
| <i>HIPK2</i>    | AF207702               | Hs.397465         | 3.86               | 0.042114       |
| <i>HIST1H1A</i> | NM_005325              | Hs.150206         | 71.47              | 0.017859       |

(continued)

SUPPLEMENTARY TABLE S1. (CONTINUED)

| <i>Gene ID</i>   | <i>Gene identifier</i> | <i>UG cluster</i> | <i>Fold change</i> | <i>p value</i> |
|------------------|------------------------|-------------------|--------------------|----------------|
| <i>HIST1H1T</i>  | NM_005323              | Hs.533293         | 3.53               | 0.030618       |
| <i>HLF</i>       | M95585                 | Hs.196952         | 4.02               | 0.01924        |
| <i>HMBOX1</i>    | NM_024567              | Hs.591836         | 5.24               | 0.040897       |
| <i>HMX1</i>      | AI939402               | Hs.104134         | 10.07              | 0.015528       |
| <i>HNF4G</i>     | NM_004133              | Hs.241529         | 5.91               | 0.014972       |
| <i>HOPX</i>      | AB059408               | Hs.654864         | 5.03               | 0.026112       |
| <i>HOXA13</i>    | BG289306               | Hs.592172         | 7.64               | 0.032162       |
| <i>HOXA3</i>     | AW137982               | Hs.659337         | 5.45               | 0.002327       |
| <i>HOXA4</i>     | NM_002141              | Hs.533357         | 6.69               | 0.027229       |
| <i>HOXA6</i>     | NM_024014              | Hs.679517         | 3.05               | 0.040474       |
| <i>HOXA7</i>     | AI492051               | Hs.660918         | 140.96             | 0.007791       |
| <i>HOXB6</i>     | AA527340               | Hs.98428          | 3.47               | 0.009142       |
| <i>HOXB7</i>     | AW102783               | Hs.436181         | 5.14               | 0.007402       |
| <i>HOXC6</i>     | NM_018953              | Hs.549040         | 3.02               | 0.007553       |
| <i>HOXD1</i>     | NM_024501              | Hs.83465          | 7.02               | 0.02978        |
| <i>HOXD11</i>    | NM_021192              | Hs.421136         | 4.96               | 0.016094       |
| <i>HOXD4</i>     | NM_014621              | Hs.591609         | 3.72               | 0.03288        |
| <i>HOXD8</i>     | BF057634               | Hs.301963         | 13.84              | 0.014693       |
| <i>HOXD9</i>     | AI432470               | Hs.709219         | 7.83               | 0.01301        |
| <i>HSF2BP</i>    | NM_007031              | Hs.406157         | 87.35              | 0.022817       |
| <i>HSF5</i>      | AL137385               | Hs.380061         | 31.41              | 0.005726       |
| <i>HSFY1</i>     | AF332227               | Hs.662281         | 3.61               | 0.033518       |
| <i>IFNAR2</i>    | L41944                 | Hs.708195         | 15.82              | 0.000879       |
| <i>IKZF1</i>     | S80876                 | Hs.435949         | 7.4                | 0.036962       |
| <i>IL26</i>      | NM_018402              | Hs.272350         | 3.73               | 0.020981       |
| <i>ING3</i>      | NM_019071              | Hs.489811         | 10.72              | 0.015899       |
| <i>ING5</i>      | AI971618               | Hs.645460         | 5.38               | 0.037401       |
| <i>IRAK3</i>     | BC029493               | Hs.369265         | 3.03               | 0.002287       |
| <i>IRF6</i>      | NM_006147              | Hs.719361         | 4.22               | 0.03557        |
| <i>IRF8</i>      | AI073984               | Hs.137427         | 58.99              | 7.79E-06       |
| <i>ISL1</i>      | NM_002202              | Hs.505            | 13.13              | 0.000583       |
| <i>JMJD6</i>     | NM_015167              | Hs.514505         | 3.91               | 0.038449       |
| <i>KCNH1</i>     | NM_002238              | Hs.553187         | 6.4                | 0.018718       |
| <i>KCNH7</i>     | AF032897               | Hs.657413         | 3.51               | 0.031955       |
| <i>KCNH8</i>     | NM_144633              | Hs.475656         | 3.28               | 0.007587       |
| <i>KCNIP3</i>    | AK025847               | Hs.437376         | 5.73               | 0.024237       |
| <i>KDM3A</i>     | AA524505               | Hs.557425         | 9.03               | 0.000412       |
| <i>KDM6B</i>     | AI830331               | Hs.223678         | 20.85              | 0.008573       |
| <i>KLF11</i>     | AF028008               | Hs.12229          | 5.96               | 0.000634       |
| <i>KLF2</i>      | NM_016270              | Hs.715677         | 61.53              | 9.84E-05       |
| <i>KLF5</i>      | AF132818               | Hs.508234         | 14.49              | 0.034933       |
| <i>LCOR</i>      | AW663968               | Hs.500695         | 6.25               | 0.030339       |
| <i>LEF1</i>      | AF288571               | Hs.719332         | 60.54              | 0.008292       |
| <i>LHX2</i>      | NM_004789              | Hs.696425         | 6.33               | 0.046111       |
| <i>LHX8</i>      | BC040321               | Hs.403934         | 132.4              | 0.000802       |
| <i>LHX9</i>      | AJ296272               | Hs.442578         | 4.58               | 0.022008       |
| <i>LOC730092</i> | AI919493               | Hs.658149         | 4.02               | 0.039829       |
| <i>LPIN2</i>     | U55968                 | Hs.132342         | 3.66               | 0.011224       |
| <i>LRCH4</i>     | AI660075               | Hs.125742         | 3.86               | 0.022102       |
| <i>LRRFIP1</i>   | AV648843               | Hs.471779         | 3.08               | 0.003847       |
| <i>LSM11</i>     | AI492353               | Hs.631954         | 8.11               | 0.006564       |
| <i>LZTS1</i>     | AF123656               | Hs.521432         | 3.12               | 0.015838       |
| <i>MAEL</i>      | AA446073               | Hs.651245         | 218.11             | 0.001463       |
| <i>MAFG</i>      | NM_002359              | Hs.252229         | 4.56               | 0.004604       |
| <i>MAFK</i>      | BG231691               | Hs.520612         | 11.51              | 0.002855       |
| <i>MAGOH</i>     | AF067173               | Hs.421576         | 4.82               | 2.46E-06       |
| <i>MAPRE3</i>    | NM_012326              | Hs.515860         | 101.82             | 0.025037       |
| <i>MAT2B</i>     | NM_013283              | Hs.54642          | 4.27               | 0.00034        |
| <i>MAX</i>       | BC003525               | Hs.285354         | 5.31               | 1.20E-06       |
| <i>MBD2</i>      | NM_003927              | Hs.25674          | 3.05               | 0.046642       |
| <i>MBIP</i>      | NM_016586              | Hs.368647         | 3.37               | 0.023521       |
| <i>MED13</i>     | AB011165               | Hs.282678         | 4.77               | 0.016316       |

(continued)

SUPPLEMENTARY TABLE S1. (CONTINUED)

| <i>Gene ID</i> | <i>Gene identifier</i> | <i>UG cluster</i> | <i>Fold change</i> | <i>p value</i> |
|----------------|------------------------|-------------------|--------------------|----------------|
| <i>MED13L</i>  | BG426689               | Hs.603766         | 4.33               | 0.028355       |
| <i>MED19</i>   | BE781103               | Hs.43619          | 6.89               | 0.027492       |
| <i>MED21</i>   | AI688580               | Hs.286145         | 5.81               | 0.002051       |
| <i>MED30</i>   | AI026938               | Hs.492612         | 4.65               | 0.000239       |
| <i>MED8</i>    | BG230758               | Hs.301756         | 13.17              | 8.71E-05       |
| <i>MESP1</i>   | BC006219               | Hs.447531         | 14.77              | 0.006322       |
| <i>MGA</i>     | BF438227               | Hs.187569         | 7.71               | 0.00299        |
| <i>MITF</i>    | AL117653               | Hs.166017         | 23.79              | 0.000796       |
| <i>MIXL1</i>   | AF211891               | Hs.710576         | 10.85              | 0.042906       |
| <i>MLL3</i>    | BE962679               | Hs.647120         | 20.92              | 0.00104        |
| <i>MLL4</i>    | NM_014727              | Hs.92236          | 4.8                | 0.014748       |
| <i>MLLT1</i>   | AW962605               | Hs.10095          | 3.81               | 6.86E-05       |
| <i>MLLT11</i>  | BC006471               | Hs.75823          | 5.65               | 0.001975       |
| <i>MLX</i>     | N40555                 | Hs.714749         | 5.83               | 1.18E-06       |
| <i>MSI2</i>    | BE000929               | Hs.658922         | 8.19               | 0.008127       |
| <i>MSL1</i>    | AI800794               | Hs.532786         | 5.09               | 0.020338       |
| <i>MSL3</i>    | NM_006800              | Hs.655288         | 4.41               | 0.009071       |
| <i>MSX1</i>    | AI421295               | Hs.424414         | 7.44               | 0.035532       |
| <i>MSX2</i>    | D89377                 | Hs.89404          | 8.18               | 0.004802       |
| <i>MTERFD1</i> | NM_015942              | Hs.308613         | 8.97               | 5.83E-05       |
| <i>MUSK</i>    | AI341265               | Hs.521653         | 5.29               | 0.02576        |
| <i>MXD1</i>    | AI188653               | Hs.468908         | 141.31             | 1.01E-05       |
| <i>MXI1</i>    | NM_005962              | Hs.719185         | 7.53               | 0.001169       |
| <i>MYNN</i>    | NM_018657              | Hs.507025         | 4.46               | 0.006123       |
| <i>MYPOP</i>   | AA307731               | Hs.515478         | 8.97               | 0.018575       |
| <i>MYT1L</i>   | BE671048               | Hs.434418         | 6.25               | 0.035909       |
| <i>NANOS1</i>  | AW970089               | Hs.591918         | 12.9               | 0.009298       |
| <i>NARG1</i>   | AF327722               | Hs.715706         | 6.3                | 0.021327       |
| <i>NCOA3</i>   | AI761748               | Hs.592142         | 4.48               | 0.001021       |
| <i>NCOA6</i>   | AF128458               | Hs.368971         | 9.84               | 9.67E-05       |
| <i>NEUROG3</i> | NM_020999              | Hs.532682         | 4.25               | 0.011428       |
| <i>NFATC1</i>  | U08015                 | Hs.534074         | 8.7                | 0.023009       |
| <i>NFATC2</i>  | U43342                 | Hs.713650         | 10.37              | 0.027008       |
| <i>NFATC3</i>  | NM_004555              | Hs.632209         | 5.19               | 0.000118       |
| <i>NFIC</i>    | AW134798               | Hs.170131         | 3.26               | 0.02342        |
| <i>NFKBIA</i>  | AI078167               | Hs.81328          | 24.67              | 0.009999       |
| <i>NFYA</i>    | AL137443               | Hs.10441          | 3.67               | 0.025955       |
| <i>NFYC</i>    | NM_014223              | Hs.233458         | 4.13               | 0.024371       |
| <i>NKX2-5</i>  | NM_004387              | Hs.54473          | 3.92               | 0.03935        |
| <i>NKX3-1</i>  | AF247704               | Hs.55999          | 34.21              | 0.009917       |
| <i>NLRC5</i>   | AA005023               | Hs.528836         | 4.83               | 0.0038         |
| <i>NPAS2</i>   | AI743090               | Hs.156832         | 8.06               | 0.001001       |
| <i>NPAS3</i>   | AL079281               | Hs.657892         | 8.37               | 0.005381       |
| <i>NPM2</i>    | AI016313               | Hs.131055         | 15.91              | 0.043543       |
| <i>NR1H4</i>   | NM_005123              | Hs.282735         | 25.63              | 0.002325       |
| <i>NR2C1</i>   | M21985                 | Hs.108301         | 3.43               | 0.016047       |
| <i>NR2E1</i>   | AF220532               | Hs.157688         | 354.22             | 0.004543       |
| <i>NR2F2</i>   | M64497                 | Hs.657455         | 15.01              | 0.014552       |
| <i>NR3C2</i>   | NM_000901              | Hs.163924         | 4.87               | 0.028272       |
| <i>NR4A3</i>   | NM_006981              | Hs.279522         | 7.21               | 0.016921       |
| <i>NR5A2</i>   | BC027893               | Hs.33446          | 3.58               | 0.037019       |
| <i>NTRK3</i>   | AI140305               | Hs.410969         | 11.22              | 0.010788       |
| <i>NUFIP1</i>  | NM_012345              | Hs.525006         | 3.19               | 0.00313        |
| <i>OLIG1</i>   | AL355743               | Hs.56663          | 41.67              | 0.003045       |
| <i>OTP</i>     | BC001800               | Hs.202247         | 3.66               | 0.010687       |
| <i>OTX2</i>    | NM_021728              | Hs.288655         | 6.68               | 0.032022       |
| <i>PADI4</i>   | AF229067               | Hs.522969         | 18.83              | 0.005636       |
| <i>PAPD4</i>   | AI434509               | Hs.418198         | 4.08               | 0.017454       |
| <i>PAX2</i>    | AW769732               | Hs.155644         | 3.3                | 0.019616       |
| <i>PAX8</i>    | BC001060               | Hs.469728         | 6.87               | 0.026598       |
| <i>PAXIP1</i>  | AI357401               | Hs.443881         | 5.41               | 0.002475       |
| <i>PCMT1</i>   | NM_005389              | Hs.279257         | 3.59               | 0.000315       |

(continued)

SUPPLEMENTARY TABLE S1. (CONTINUED)

| <i>Gene ID</i> | <i>Gene identifier</i> | <i>UG cluster</i> | <i>Fold change</i> | <i>p value</i> |
|----------------|------------------------|-------------------|--------------------|----------------|
| PCNA           | NM_002592              | Hs.147433         | 4.74               | 2.96E-06       |
| PDE8A          | NM_002605              | Hs.9333           | 3.24               | 0.011325       |
| PDE8B          | AK023913               | Hs.584830         | 182.56             | 0.0025         |
| PEG3           | NM_015363              | Hs.719209         | 44.98              | 0.023218       |
| PER2           | NM_022817              | Hs.58756          | 15.92              | 1.09E-07       |
| PER3           | NM_016831              | Hs.162200         | 3.06               | 0.001114       |
| PHOX2A         | A1469991               | Hs.707879         | 3.12               | 0.041952       |
| PHTF1          | AW517261               | Hs.655824         | 13.59              | 2.14E-05       |
| PIAS1          | NM_016166              | Hs.162458         | 3.97               | 0.016942       |
| PIAS4          | AK022481               | Hs.105779         | 3.53               | 0.012471       |
| PITX1          | NM_002653              | Hs.84136          | 6.54               | 0.035271       |
| POLR1D         | N32181                 | Hs.507584         | 5.87               | 0.000119       |
| POU2AF1        | BC022056               | Hs.654525         | 4.47               | 0.029639       |
| POU4F1         | L20433                 | Hs.654522         | 12.75              | 0.015087       |
| PPARA          | BG426657               | Hs.103110         | 7.76               | 0.000374       |
| PPM1A          | NM_021003              | Hs.130036         | 9.48               | 5.73E-09       |
| PRDM16         | NM_022114              | Hs.99500          | 3.69               | 0.006687       |
| PRDM4          | NM_012406              | Hs.506655         | 3.08               | 0.035952       |
| PRDM5          | BC030136               | Hs.669312         | 8.65               | 0.041362       |
| PRMT1          | AF085918               | Hs.20521          | 4.14               | 0.011829       |
| PRMT2          | A1928367               | Hs.154163         | 7.12               | 0.00637        |
| PROP1          | AF076215               | Hs.158301         | 6.55               | 0.044637       |
| PTGER3         | NM_000957              | Hs.445000         | 3.58               | 0.039988       |
| PTH            | NM_000315              | Hs.37045          | 4.01               | 0.039333       |
| PTTG1          | NM_004219              | Hs.350966         | 7.41               | 3.41E-06       |
| RAB6A          | BC003617               | Hs.503222         | 4.67               | 0.015953       |
| RAD54L2        | AU159543               | Hs.105399         | 8.82               | 0.013932       |
| RBBP5          | NM_005057              | Hs.519230         | 4.67               | 0.023139       |
| RBL2           | X76061                 | Hs.513609         | 9.04               | 0.00854        |
| RCAN1          | NM_004414              | Hs.282326         | 21.37              | 7.76E-05       |
| RELA           | NM_021975              | Hs.502875         | 3.17               | 0.039562       |
| RERE           | AK096094               | Hs.463041         | 4.48               | 0.021114       |
| RFC1           | BE504689               | Hs.507475         | 3.79               | 0.037032       |
| RFX6           | NM_173560              | Hs.352276         | 6.24               | 0.044325       |
| RHEBL1         | NM_144593              | Hs.159013         | 7.25               | 0.025008       |
| RNF10          | NM_014868              | Hs.442798         | 4.37               | 0.000176       |
| RNF14          | AB022663               | Hs.483616         | 16.89              | 0.001545       |
| RORA           | BC035094               | Hs.655155         | 13.47              | 0.036045       |
| RORC           | A1218580               | Hs.256022         | 4.36               | 0.038153       |
| RPL26L1        | NM_016093              | Hs.546390         | 4.16               | 0.000262       |
| RPL38          | BC000603               | Hs.380953         | 4.21               | 0.04764        |
| RPS11          | BF680255               | Hs.433529         | 3.51               | 0.048496       |
| RPS6KA5        | AF074393               | Hs.510225         | 9.6                | 0.005491       |
| RPS8           | AA976278               | Hs.512675         | 4.88               | 0.007717       |
| RRN3           | AL110238               | Hs.460078         | 3.86               | 0.015649       |
| RUNX1          | D43967                 | Hs.149261         | 14.17              | 0.002855       |
| RUNX1T1        | X79990                 | Hs.368431         | 48.56              | 0.016062       |
| RXRG           | NM_006917              | Hs.26550          | 4.66               | 0.037446       |
| S100A1         | NM_006271              | Hs.515715         | 3.44               | 0.035529       |
| SAP30          | NM_003864              | Hs.591715         | 7.3                | 0.000514       |
| SCML1          | NM_006746              | Hs.109655         | 34.52              | 1.93E-06       |
| SEC14L2        | AI571796               | Hs.335614         | 7.66               | 0.015625       |
| SETD8          | AI813938               | Hs.443735         | 3.97               | 0.028496       |
| SFRS17A        | BC001620               | Hs.522572         | 3.21               | 0.01472        |
| SHOX2          | NM_006884              | Hs.55967          | 8.1                | 0.0245         |
| SIN3A          | AI433017               | Hs.513039         | 7.21               | 9.71E-09       |
| SIRT7          | NM_016538              | Hs.514636         | 3.66               | 0.032429       |
| SLA2           | AA305476               | Hs.713578         | 5.56               | 0.003619       |
| SMAD1          | AU146891               | Hs.604588         | 8.84               | 0.003362       |
| SMARCA2        | AV725365               | Hs.298990         | 15.42              | 0.020349       |
| SMARCC2        | NM_003075              | Hs.236030         | 3.54               | 0.040336       |
| SMARCD3        | AW026975               | Hs.647067         | 3.73               | 0.004012       |

(continued)

SUPPLEMENTARY TABLE S1. (CONTINUED)

| <i>Gene ID</i> | <i>Gene identifier</i> | <i>UG cluster</i> | <i>Fold change</i> | <i>p value</i> |
|----------------|------------------------|-------------------|--------------------|----------------|
| SMYD2          | AW135582               | Hs.66170          | 6.7                | 0.013551       |
| SNAPC1         | NM_003082              | Hs.179312         | 3.88               | 0.000301       |
| SOX1           | NM_005986              | Hs.202526         | 26.31              | 0.030659       |
| SOX13          | AF116571               | Hs.201671         | 3.07               | 0.000904       |
| SOX15          | NM_006942              | Hs.95582          | 21.6               | 0.000321       |
| SOX18          | NM_018419              | Hs.8619           | 3.64               | 0.041842       |
| SOX30          | NM_007017              | Hs.716685         | 286.24             | 0.002013       |
| SOX5           | NM_006940              | Hs.657542         | 3.14               | 0.018024       |
| SOX7           | AI808807               | Hs.709543         | 6.73               | 0.025222       |
| SP2            | D28588                 | Hs.514276         | 3.19               | 0.009484       |
| SPDEF          | AI307915               | Hs.485158         | 3.3                | 0.004024       |
| SUDS3          | AK024460               | Hs.416630         | 21.87              | 0.004211       |
| TACC3          | NM_006342              | Hs.104019         | 5.64               | 0.017536       |
| TADA2L         | BC001172               | Hs.500066         | 5.32               | 0.020987       |
| TAF2           | AK001618               | Hs.122752         | 5.37               | 0.029035       |
| TAF4           | AI744029               | Hs.18857          | 5.17               | 0.002343       |
| TAF4B          | AI366784               | Hs.369519         | 21.2               | 0.017582       |
| TAF5           | AW138827               | Hs.96103          | 15.13              | 0.001655       |
| TAX1BP1        | NM_006024              | Hs.34576          | 5.75               | 0.011349       |
| TBL1Y          | AF332222               | Hs.664560         | 3.19               | 0.015028       |
| TBPL1          | NM_004865              | Hs.486507         | 4.15               | 0.001469       |
| TBR1           | NM_006593              | Hs.210862         | 4.01               | 0.014674       |
| TBX1           | AF012130               | Hs.173984         | 3.66               | 0.031661       |
| TBX20          | AJ237589               | Hs.404167         | 5.21               | 0.013597       |
| TBX3           | NM_016569              | Hs.714737         | 9.37               | 0.005353       |
| TBX5           | AW269421               | Hs.381715         | 212.87             | 0.017223       |
| TBX6           | NM_004608              | Hs.198301         | 3.2                | 0.03287        |
| TCEANC         | NM_152634              | Hs.222855         | 9.02               | 0.010137       |
| TCEB3C         | NM_145653              | Hs.515381         | 4.5                | 0.043816       |
| TCF7           | NM_003202              | Hs.573153         | 3.52               | 0.015075       |
| TCL1A          | X82240                 | Hs.2484           | 421.02             | 0.000203       |
| TDRD9          | AI989706               | Hs.21454          | 57.41              | 0.007348       |
| TFAP2B         | NM_003221              | Hs.33102          | 22.69              | 0.001278       |
| TGIF2LY        | AF332223               | Hs.112148         | 4.1                | 0.04231        |
| TLK2           | AU151689               | Hs.445078         | 3.45               | 0.011165       |
| TP63           | AF091627               | Hs.137569         | 85.83              | 0.005082       |
| TRAK1          | AI633774               | Hs.535711         | 32.1               | 0.002952       |
| TSC22D2        | NM_014779              | Hs.715600         | 19.29              | 0.001459       |
| TSHZ1          | AF039698               | Hs.284217         | 15.05              | 0.016956       |
| TSSK6          | AF348077               | Hs.532711         | 11.9               | 0.020932       |
| TULP3          | AK024246               | Hs.655333         | 13.41              | 0.045277       |
| TWIST1         | X99268                 | Hs.66744          | 166.94             | 0.012464       |
| UHRF1          | AK025578               | Hs.108106         | 22.1               | 5.12E-07       |
| USP2           | AW274034               | Hs.524085         | 22.28              | 0.018275       |
| VAV1           | NM_005428              | Hs.116237         | 3.13               | 0.026631       |
| VDR            | AA454701               | Hs.524368         | 6.44               | 0.012965       |
| VEZF1          | AU146275               | Hs.463569         | 5.45               | 0.025283       |
| VPS72          | NM_005997              | Hs.2430           | 3.32               | 0.04353        |
| VSX1           | AF251033               | Hs.274264         | 3.79               | 0.044198       |
| WAPAL          | D87450                 | Hs.203099         | 4.73               | 0.003541       |
| WHSC2          | AF101434               | Hs.21771          | 11.81              | 0.005111       |
| WNT9A          | BE220265               | Hs.149504         | 9.65               | 0.037812       |
| WT1            | S75264                 | Hs.591980         | 6.41               | 0.044741       |
| XRN1           | BG534738               | Hs.435103         | 6.4                | 0.006576       |
| YBX2           | NM_015982              | Hs.567494         | 4.06               | 0.012094       |
| YEATS2         | BC032368               | Hs.632575         | 3.89               | 0.026498       |
| ZBTB17         | AW082221               | Hs.433764         | 3.61               | 0.005148       |
| ZC3H8          | AF334161               | Hs.418416         | 3.79               | 0.040659       |
| ZCCHC6         | AW070776               | Hs.655162         | 4.52               | 0.018594       |
| ZFHX3          | NM_006885              | Hs.598297         | 3.02               | 0.027848       |
| ZHX1           | AI123518               | Hs.612084         | 13.14              | 0.013161       |
| ZHX2           | NM_014943              | Hs.719079         | 6.86               | 0.029497       |

(continued)

SUPPLEMENTARY TABLE S1. (CONTINUED)

| <i>Gene ID</i> | <i>Gene identifier</i> | <i>UG cluster</i> | <i>Fold change</i> | <i>p value</i> |
|----------------|------------------------|-------------------|--------------------|----------------|
| ZNF131         | BE972394               | Hs.535804         | 3.1                | 0.005278       |
| ZNF136         | NM_003437              | Hs.479874         | 5.1                | 0.034258       |
| ZNF148         | NM_021964              | Hs.592591         | 4.76               | 0.03178        |
| ZNF155         | NM_003445              | Hs.502127         | 13.34              | 0.031716       |
| ZNF214         | NM_013249              | Hs.445849         | 6.18               | 0.038319       |
| ZNF215         | NM_013250              | Hs.523457         | 7.37               | 1.14E-06       |
| ZNF229         | AF192979               | Hs.709348         | 3.24               | 0.019127       |
| ZNF235         | NM_004234              | Hs.298089         | 3.88               | 0.013727       |
| ZNF25          | N32599                 | Hs.499429         | 9.37               | 0.003137       |
| ZNF257         | AF070651               | Hs.283900         | 17.01              | 0.019162       |
| ZNF285A        | AW513227               | Hs.709428         | 6.66               | 0.019309       |
| ZNF343         | NM_024325              | Hs.516846         | 6.89               | 0.010471       |
| ZNF397         | AW291411               | Hs.591061         | 5.89               | 0.011607       |
| ZNF404         | AI393706               | Hs.76561          | 6.81               | 0.038963       |
| ZNF436         | AB051497               | Hs.293798         | 11.44              | 0.024662       |
| ZNF443         | BI830259               | Hs.631623         | 5.81               | 0.01881        |
| ZNF449         | AI888786               | Hs.28780          | 5.43               | 7.86E-05       |
| ZNF479         | AF277624               | Hs.616660         | 4.48               | 0.049942       |
| ZNF506         | AI559570               | Hs.351906         | 9.17               | 0.003976       |
| ZNF529         | N62934                 | Hs.708146         | 3.33               | 0.010278       |
| ZNF540         | BE466117               | Hs.121283         | 4.27               | 0.026231       |
| ZNF546         | AA130174               | Hs.709400         | 6.84               | 0.046006       |
| ZNF552         | AK023769               | Hs.560727         | 4                  | 0.01283        |
| ZNF555         | BF435923               | Hs.47712          | 3.22               | 0.01978        |
| ZNF556         | NM_024967              | Hs.287433         | 11.34              | 0.049657       |
| ZNF558         | AW119060               | Hs.659797         | 3.36               | 0.038294       |
| ZNF560         | NM_152476              | Hs.631613         | 24.42              | 0.001516       |
| ZNF585A        | AA203136               | Hs.390568         | 7.45               | 0.008089       |
| ZNF599         | AI222019               | Hs.590961         | 11.39              | 0.038477       |
| ZNF610         | AA776810               | Hs.357663         | 6.48               | 0.008189       |
| ZNF641         | BF541598               | Hs.23492          | 6.59               | 0.002412       |
| ZNF677         | AK026366               | Hs.20506          | 11.06              | 0.000993       |
| ZNF689         | W80378                 | Hs.454685         | 6.57               | 0.00809        |
| ZNF76          | NM_003427              | Hs.388024         | 4.8                | 0.00648        |
| ZNF786         | N30616                 | Hs.31743          | 7.13               | 0.006703       |
| ZNF93          | BC020837               | Hs.301059         | 14.29              | 0.000725       |

SUPPLEMENTARY TABLE S2. RHESUS MONKEY PUTATIVE CANDIDATE OOCYTE REPROGRAMMING FACTORS (CORFs)

| <i>Gene ID</i>  | <i>Gene identifier</i> | <i>UG cluster</i> | <i>Ratio</i> | <i>p value</i> |
|-----------------|------------------------|-------------------|--------------|----------------|
| <i>ABL1</i>     | NM_005157              | Hs.431048         | 7.97         | 0.000136       |
| <i>AFAP1L2</i>  | AW138743               | Hs.501106         | 155.48       | 0.002011       |
| <i>AFF1</i>     | BF575588               | Hs.480190         | 60.81        | 2.37E-05       |
| <i>AHCTF1</i>   | AI138934               | Hs.300887         | 4.79         | 0.000366       |
| <i>ALKBH2</i>   | AI865555               | Hs.374458         | 36.39        | 0.009836       |
| <i>ANKRD49</i>  | NM_017704              | Hs.29052          | 20.44        | 0.002137       |
| <i>AOF1</i>     | BE348688               | Hs.709336         | 11.93        | 0.016487       |
| <i>ARID2</i>    | AW104509               | Hs.317304         | 8.17         | 0.000161       |
| <i>ARID4B</i>   | BF058966               | Hs.575782         | 5.94         | 0.008563       |
| <i>ARIH2</i>    | BC000422               | Hs.633601         | 5.2          | 0.01783        |
| <i>ASCL1</i>    | AW950513               | Hs.704281         | 6.65         | 0.037991       |
| <i>ASCL2</i>    | AI393930               | Hs.152475         | 4.91         | 0.011745       |
| <i>ASF1A</i>    | AB028628               | Hs.292316         | 16.75        | 0.000213       |
| <i>ASF1B</i>    | NM_018154              | Hs.26516          | 12.36        | 0.010311       |
| <i>ASXL1</i>    | AI829840               | Hs.374043         | 13.58        | 0.00965        |
| <i>ASZ1</i>     | BC034963               | Hs.352412         | 75.94        | 8.12E-05       |
| <i>ATF5</i>     | BC005174               | Hs.9754           | 9.95         | 0.015325       |
| <i>ATF7IP2</i>  | AV716964               | Hs.513343         | 77.75        | 0.043632       |
| <i>ATXN1</i>    | NM_000332              | Hs.434961         | 5.19         | 1.81E-05       |
| <i>BACH1</i>    | NM_001186              | Hs.154276         | 7.1          | 0.02418        |
| <i>BANP</i>     | NM_017869              | Hs.461705         | 30.03        | 0.025058       |
| <i>BAZ1A</i>    | AA102574               | Hs.509140         | 6.75         | 0.028695       |
| <i>BCL6B</i>    | AB076580               | Hs.22575          | 5.12         | 0.019288       |
| <i>BCORL1</i>   | NM_021946              | Hs.496748         | 11.39        | 0.032508       |
| <i>BRD4</i>     | BF718610               | Hs.187763         | 7.09         | 0.000345       |
| <i>BRDT</i>     | NM_001726              | Hs.482520         | 123.68       | 0.015027       |
| <i>BRPF1</i>    | NM_004634              | Hs.1004           | 20.75        | 0.016919       |
| <i>C17orf49</i> | AV759602               | Hs.511801         | 13.86        | 0.002594       |
| <i>C1orf59</i>  | BE502436               | Hs.7962           | 324.61       | 0.002106       |
| <i>C21orf45</i> | NM_018944              | Hs.190518         | 52.69        | 0.005675       |
| <i>C2orf65</i>  | Y12839                 | Hs.348645         | 74           | 3.96E-05       |
| <i>CAMTA1</i>   | AF111804               | Hs.397705         | 44.96        | 0.00292        |
| <i>CAND2</i>    | AB014567               | Hs.343664         | 281.69       | 0.012719       |
| <i>CAPRN2</i>   | AF326778               | Hs.234355         | 4.8          | 0.018162       |
| <i>CBX2</i>     | BE514414               | Hs.368410         | 117.52       | 0.000834       |
| <i>CCNA1</i>    | NM_003914              | Hs.417050         | 18.52        | 0.002389       |
| <i>CCNE1</i>    | AI671049               | Hs.244723         | 43.73        | 0.001157       |
| <i>CDC45L</i>   | NM_003504              | Hs.474217         | 14.63        | 0.000301       |
| <i>CDK7</i>     | L20320                 | Hs.184298         | 10.67        | 0.000325       |
| <i>CDX4</i>     | NM_005193              | Hs.553488         | 22.38        | 0.037579       |
| <i>CDYL</i>     | AL050164               | Hs.269092         | 9.85         | 0.026793       |
| <i>CEBPG</i>    | BE622659               | Hs.429666         | 4.8          | 0.017737       |
| <i>CENPI</i>    | BF793446               | Hs.348920         | 11.55        | 0.000928       |
| <i>CENPQ</i>    | NM_018132              | Hs.88663          | 7.17         | 0.000371       |
| <i>CHAF1A</i>   | BF000239               | Hs.79018          | 54.76        | 0.015053       |
| <i>CHD4</i>     | AI761771               | Hs.162233         | 4.71         | 0.008192       |
| <i>CHD7</i>     | AI870918               | Hs.20395          | 174.94       | 0.025683       |
| <i>CNBP</i>     | BF063728               | Hs.518249         | 6.89         | 0.001063       |
| <i>CNOT6L</i>   | AW514857               | Hs.592519         | 30.12        | 0.000498       |
| <i>CREB5</i>    | NM_004904              | Hs.437075         | 4.88         | 0.035017       |
| <i>CRYM</i>     | NM_001888              | Hs.924            | 61.99        | 0.034099       |
| <i>CSDE1</i>    | AA167775               | Hs.69855          | 5.76         | 0.001114       |
| <i>CSTF2</i>    | NM_001325              | Hs.132370         | 5.49         | 0.012157       |
| <i>CTCF</i>     | NM_080618              | Hs.131543         | 193.66       | 0.001519       |
| <i>CTDP1</i>    | NM_004715              | Hs.465490         | 19.11        | 0.003461       |
| <i>CUX1</i>     | BE046521               | Hs.654389         | 13.93        | 0.017428       |
| <i>CYLD</i>     | AK024212               | Hs.578973         | 5.92         | 0.030656       |
| <i>CYP2C9</i>   | M15331                 | Hs.282624         | 13.27        | 0.008216       |
| <i>CYP3A5</i>   | NM_000777              | Hs.695915         | 32.49        | 0.024635       |
| <i>DAB2IP</i>   | AB051530               | Hs.522378         | 77.69        | 0.005003       |
| <i>DBP</i>      | U79283                 | Hs.414480         | 4.52         | 0.028339       |
| <i>DCP2</i>     | BE896137               | Hs.443875         | 36.18        | 0.003064       |

(continued)



SUPPLEMENTARY TABLE S2. (CONTINUED)

| <i>Gene ID</i> | <i>Gene identifier</i> | <i>UG cluster</i> | <i>Ratio</i> | <i>p value</i> |
|----------------|------------------------|-------------------|--------------|----------------|
| DIP2A          | BC033718               | Hs.189585         | 30.41        | 0.025575       |
| DLX6           | T65128                 | Hs.249196         | 29.13        | 0.002253       |
| DMRTB1         | AI198850               | Hs.131654         | 4.67         | 0.021338       |
| DNMT1          | NM_001379              | Hs.202672         | 12.89        | 0.000888       |
| DNMT3A         | NM_022552              | Hs.515840         | 84.94        | 0.020524       |
| DPPA3          | AI066520               | Hs.131358         | 654.65       | 3.36E-05       |
| DPPA5          | AI365263               | Hs.125331         | 235.34       | 0.027331       |
| DRD3           | NM_000796              | Hs.121478         | 10.36        | 0.002048       |
| DVL3           | U49262                 | Hs.388116         | 6.99         | 0.027624       |
| E2F1           | NM_005225              | Hs.654393         | 7.24         | 0.003169       |
| EDA            | AF061193               | Hs.105407         | 6.53         | 0.042164       |
| EDNRB          | NM_003991              | Hs.82002          | 11.75        | 0.023909       |
| EGR1           | AV733950               | Hs.326035         | 7.47         | 0.014859       |
| EIF1B          | NM_005875              | Hs.315230         | 6.52         | 0.024615       |
| EIF4E3         | AI935522               | Hs.581355         | 11.47        | 0.000628       |
| ELF1           | AL559590               | Hs.135646         | 6.11         | 0.000307       |
| ELF5           | AF115403               | Hs.11713          | 65.73        | 0.029769       |
| EMX1           | AW196403               | Hs.516090         | 20.96        | 0.036375       |
| EPB41L5        | AI652872               | Hs.654802         | 30.27        | 0.041944       |
| ERG            | AA296657               | Hs.473819         | 65.6         | 0.036131       |
| ER11           | AL137679               | Hs.20000          | 7            | 0.000465       |
| ESR2           | AB006589               | Hs.660607         | 6.26         | 0.030952       |
| ESRRB          | AK096020               | Hs.435845         | 13.08        | 0.029342       |
| FBXO5          | AK026197               | Hs.520506         | 10.12        | 0.003444       |
| FOXE3          | NM_012186              | Hs.112968         | 20.27        | 0.001848       |
| FOXH1          | NM_003923              | Hs.708365         | 5.15         | 0.011397       |
| FO XK2         | AI798846               | Hs.591140         | 6.53         | 0.029617       |
| FO XN4         | AF425597               | Hs.528316         | 33.42        | 0.023576       |
| FOXO1          | AW117498               | Hs.370666         | 30.79        | 0.000427       |
| FOXO3          | BE888885               | Hs.220950         | 4.84         | 0.019727       |
| FOXP4          | AI673539               | Hs.131436         | 6.75         | 0.0067         |
| FOXR1          | AA669512               | Hs.116679         | 518.51       | 3.21E-05       |
| FRZB           | NM_001463              | Hs.128453         | 21.21        | 0.008573       |
| FTSJD2         | D43949                 | Hs.520102         | 7.66         | 0.009591       |
| FZD3           | NM_017412              | Hs.40735          | 207.21       | 0.016627       |
| FZD4           | NM_012193              | Hs.591968         | 12.72        | 0.010388       |
| GAS7           | BE439987               | Hs.462214         | 51.17        | 0.000168       |
| GATA4          | AV700724               | Hs.243987         | 23.02        | 0.002759       |
| GATAD2A        | NM_017660              | Hs.709287         | 4.85         | 0.005977       |
| GCM1           | AB026493               | Hs.28346          | 26.93        | 0.007438       |
| GRM5           | D60132                 | Hs.719168         | 6.93         | 0.040593       |
| GSG2           | AB039834               | Hs.534059         | 11.98        | 0.000493       |
| GTF2A2         | NM_004492              | Hs.512934         | 4.91         | 0.044354       |
| GTF2B          | NM_001514              | Hs.481852         | 6.8          | 0.003709       |
| H1FOO          | NM_153833              | Hs.97358          | 18.04        | 0.007651       |
| H3F3B          | AW138159               | Hs.180877         | 12.42        | 0.006075       |
| HAND1          | NM_004821              | Hs.152531         | 5.05         | 0.024513       |
| HBP1           | AF019214               | Hs.162032         | 5.32         | 0.0018         |
| HCFC1          | AA703045               | Hs.83634          | 12.46        | 0.029827       |
| HDAC10         | AL022328               | -                 | 7.78         | 0.005599       |
| HEXIM2         | AI972367               | Hs.56382          | 6.76         | 0.001711       |
| HEY2           | NM_012259              | Hs.144287         | 81.82        | 0.000142       |
| HHEX           | Z21533                 | Hs.118651         | 193.39       | 0.0114         |
| HIC2           | AI912206               | Hs.632767         | 8.86         | 0.012104       |
| HIF3A          | AK021881               | Hs.420830         | 50.61        | 0.014219       |
| HIRIP3         | NM_003609              | Hs.592046         | 6.19         | 0.000434       |
| HIST1H1A       | NM_005325              | Hs.150206         | 83.49        | 0.000565       |
| HIST1H1E       | NM_005321              | Hs.248133         | 17.84        | 0.023504       |
| HJURP          | NM_018410              | Hs.532968         | 23.37        | 6.08E-05       |
| HLF            | W60800                 | Hs.196952         | 4.98         | 0.04791        |
| HOXD8          | BF057634               | Hs.301963         | 14.69        | 0.009945       |
| HSF2BP         | NM_007031              | Hs.406157         | 1832.78      | 0.002541       |

(continued)

SUPPLEMENTARY TABLE S2. (CONTINUED)

| <i>Gene ID</i>   | <i>Gene identifier</i> | <i>UG cluster</i> | <i>Ratio</i> | <i>p value</i> |
|------------------|------------------------|-------------------|--------------|----------------|
| <i>HSF4</i>      | AB029348               | Hs.512156         | 4.54         | 0.044092       |
| <i>HSPC152</i>   | NM_016404              | Hs.333579         | 7.69         | 0.001975       |
| <i>IKZF1</i>     | NM_006060              | Hs.488251         | 4.92         | 0.002398       |
| <i>IKZF4</i>     | BF115531               | Hs.553221         | 5.18         | 0.002842       |
| <i>ING3</i>      | NM_019071              | Hs.489811         | 14.08        | 0.026072       |
| <i>IRF6</i>      | BC014852               | Hs.719361         | 94.22        | 0.023502       |
| <i>IRF8</i>      | AI073984               | Hs.137427         | 644.49       | 0.001428       |
| <i>IWS1</i>      | AW451291               | Hs.469879         | 7.82         | 0.002721       |
| <i>JARID2</i>    | AW445218               | Hs.630189         | 9            | 0.006468       |
| <i>JAZF1</i>     | AI990891               | Hs.368944         | 13.55        | 0.031216       |
| <i>JDP2</i>      | BF109959               | Hs.196482         | 15.21        | 0.030972       |
| <i>JHDM1D</i>    | BE217882               | Hs.308710         | 8.45         | 0.0006         |
| <i>KCNH5</i>     | BC043409               | Hs.27043          | 5.26         | 0.009909       |
| <i>KCNIP3</i>    | AF367022               | Hs.437376         | 5.15         | 0.023719       |
| <i>KDM3A</i>     | AA524505               | Hs.557425         | 14.75        | 7.04E-06       |
| <i>KDM4A</i>     | BC002558               | Hs.155983         | 7.01         | 0.013588       |
| <i>KDM4D</i>     | AI467798               | Hs.503598         | 17.08        | 0.002535       |
| <i>KDM5C</i>     | BE503653               | Hs.631768         | 6.86         | 0.021104       |
| <i>KDM6B</i>     | AI830331               | Hs.223678         | 10.42        | 0.023441       |
| <i>KLF11</i>     | AF028008               | Hs.12229          | 38.39        | 0.024335       |
| <i>KLF2</i>      | NM_016270              | Hs.715677         | 34           | 0.010672       |
| <i>LASS2</i>     | AK001105               | Hs.713103         | 4.61         | 0.000876       |
| <i>LEF1</i>      | AF294627               | Hs.719332         | 45.27        | 0.004022       |
| <i>LHX8</i>      | BC040321               | Hs.403934         | 13           | 0.039359       |
| <i>LIN28B</i>    | AL039884               | Hs.23616          | 186.99       | 2.02E-05       |
| <i>LMO4</i>      | AI824831               | Hs.436792         | 8.99         | 0.025066       |
| <i>LOC705735</i> | AF230103               | Mmu.3517          | 5.99         | 0.0278         |
| <i>LOC706737</i> | CN804008               | Mmu.1429          | 6.78         | 0.010373       |
| <i>LRCH4</i>     | NM_002319              | Hs.125742         | 8.29         | 0.031995       |
| <i>LSM11</i>     | AW014922               | Hs.631954         | 11           | 0.002235       |
| <i>LZTFL1</i>    | NM_020347              | Hs.30824          | 7.89         | 0.010814       |
| <i>MAEL</i>      | AA446073               | Hs.651245         | 206.2        | 0.000104       |
| <i>MAZ</i>       | AI318120               | Hs.23650          | 6.03         | 0.011023       |
| <i>MBD2</i>      | AI827820               | Hs.25674          | 1097.44      | 0.003356       |
| <i>MBTD1</i>     | AL133577               | Hs.656803         | 4.48         | 0.041026       |
| <i>MED12L</i>    | AF388364               | Hs.58561          | 50.02        | 0.030953       |
| <i>MED13</i>     | AF151055               | Hs.282678         | 5.8          | 0.003862       |
| <i>MED19</i>     | BE781103               | Hs.43619          | 8.9          | 0.006889       |
| <i>MED20</i>     | AK023092               | Hs.278434         | 5.75         | 0.017758       |
| <i>MED6</i>      | BF434383               | Hs.497353         | 5.2          | 0.012016       |
| <i>MED8</i>      | BG230758               | Hs.301756         | 5.67         | 0.010683       |
| <i>MESP1</i>     | AL357535               | Hs.447531         | 207.89       | 0.025916       |
| <i>MESP2</i>     | AL360139               | Hs.37311          | 9.76         | 0.030075       |
| <i>METTL3</i>    | BC001650               | Hs.168799         | 4.63         | 0.002262       |
| <i>MGA</i>       | AU149225               | Hs.187569         | 5.29         | 0.009866       |
| <i>MKL2</i>      | AK093577               | Hs.49143          | 10.88        | 0.004501       |
| <i>MKRN1</i>     | AF117233               | Hs.490347         | 6.94         | 0.029037       |
| <i>MLL2</i>      | AI742164               | Hs.120228         | 11.59        | 0.029082       |
| <i>MLL3</i>      | AK025911               | Hs.647120         | 31.27        | 0.001437       |
| <i>MLLT1</i>     | AW962605               | Hs.10095          | 6.63         | 0.007381       |
| <i>MLLT10</i>    | N64035                 | Hs.30385          | 7.18         | 0.005673       |
| <i>MLLT6</i>     | BE677453               | Hs.91531          | 8.37         | 0.008081       |
| <i>MPHOSPH8</i>  | BF678375               | Hs.718457         | 5.32         | 0.022991       |
| <i>MSI2</i>      | AA521410               | Hs.658922         | 46.08        | 0.037267       |
| <i>MSL3</i>      | R10150                 | Hs.655288         | 56.46        | 0.013725       |
| <i>MSX2</i>      | D89377                 | Hs.89404          | 28.04        | 0.015681       |
| <i>MTA3</i>      | BC004227               | Hs.435413         | 12.21        | 0.003086       |
| <i>MTERFD1</i>   | NM_015942              | Hs.308613         | 7.01         | 0.005054       |
| <i>MTF1</i>      | NM_005955              | Hs.471991         | 23.39        | 0.0007         |
| <i>MTF2</i>      | AI566096               | Hs.31016          | 19.77        | 0.008512       |
| <i>MXD1</i>      | AI188653               | Hs.468908         | 63.56        | 5.11E-05       |
| <i>MYOCD</i>     | AI452798               | Hs.567641         | 14.83        | 0.0421         |

(continued)

SUPPLEMENTARY TABLE S2. (CONTINUED)

| <i>Gene ID</i> | <i>Gene identifier</i> | <i>UG cluster</i> | <i>Ratio</i> | <i>p value</i> |
|----------------|------------------------|-------------------|--------------|----------------|
| MYST3          | AJ251844               | -                 | 8.88         | 0.028587       |
| NANOS1         | AW970089               | Hs.591918         | 124.74       | 2.79E-05       |
| NASP           | AW003362               | Hs.319334         | 11.74        | 0.030982       |
| NCOA3          | AI438999               | Hs.592142         | 9.17         | 0.014894       |
| NCOA6          | AF128458               | Hs.368971         | 9.54         | 0.007692       |
| NEUROG1        | NM_006161              | Hs.248149         | 7.56         | 0.001295       |
| NFATC2         | U43342                 | Hs.713650         | 39.05        | 0.002192       |
| NFATC3         | NM_004555              | Hs.632209         | 12.25        | 0.000188       |
| NFE2L3         | NM_004289              | Hs.404741         | 13.05        | 0.001385       |
| NFKBIA         | AI078167               | Hs.81328          | 33.39        | 0.005916       |
| NFXL1          | AI743731               | Hs.646325         | 10.05        | 0.004362       |
| NFYC           | NM_014223              | Hs.233458         | 5.93         | 0.000142       |
| NIPBL          | AW272262               | Hs.481927         | 17.75        | 0.009947       |
| NKX3-1         | AF249671               | Hs.55999          | 12.12        | 0.038114       |
| NPAS1          | U51628                 | Hs.79564          | 194.29       | 0.007678       |
| NPAT           | U58852                 | Hs.171061         | 7.62         | 0.005861       |
| NPM2           | AI016313               | Hs.131055         | 131.65       | 0.006961       |
| NR2C1          | M21985                 | Hs.108301         | 18.33        | 0.008423       |
| NR5A2          | AF228413               | Hs.33446          | 94.22        | 8.92E-07       |
| NRL            | M81840                 | Hs.652297         | 7.83         | 0.015495       |
| NUFIP1         | AW593143               | Hs.525006         | 18.35        | 0.011497       |
| OLIG1          | AL355743               | Hs.56663          | 3545.32      | 0.005001       |
| ONECUT2        | H49805                 | Hs.194725         | 29.55        | 0.047819       |
| OTX1           | AI813505               | Hs.445340         | 6.24         | 0.020738       |
| OTX2           | BE779765               | Hs.288655         | 2949.14      | 0.005881       |
| OVOL1          | AA588400               | Hs.134434         | 21.81        | 0.011979       |
| PABPN1         | BF675004               | Hs.707712         | 7.25         | 0.032429       |
| PAPD4          | AI434509               | Hs.418198         | 4.69         | 0.014726       |
| PAPD5          | AU146704               | Hs.514342         | 7.91         | 0.002885       |
| PAPOLA         | AV683473               | Hs.719187         | 16.15        | 0.005373       |
| PAX8           | NM_013952              | Hs.469728         | 8.09         | 0.041566       |
| PDE8B          | AB085825               | Hs.584830         | 10.52        | 0.000253       |
| PDLIM1         | BC000915               | Hs.368525         | 29.65        | 0.001411       |
| PEG3           | NM_015363              | Hs.719209         | 4.5          | 0.002366       |
| PGR            | AL137566               | Hs.32405          | 150.93       | 0.045289       |
| PHF12          | AL161953               | Hs.714975         | 7.17         | 0.0341         |
| PIAS4          | NM_015897              | Hs.105779         | 29.07        | 0.004183       |
| PITX1          | NM_002653              | Hs.84136          | 356.66       | 0.003516       |
| PITX3          | NM_005029              | Hs.137568         | 4.81         | 0.04069        |
| PKNOX2         | AK023792               | Hs.719275         | 12.23        | 0.008233       |
| PLA2G1B        | NM_000928              | Hs.992            | 214.64       | 0.018305       |
| PLAG1          | NM_002655              | Hs.14968          | 8.37         | 0.007633       |
| PLAGL2         | NM_002657              | Hs.154104         | 6.94         | 0.001682       |
| POLR1D         | N32181                 | Hs.507584         | 5.63         | 0.007052       |
| POLR2A         | NM_000937              | Hs.270017         | 9.37         | 0.02759        |
| POLR2F         | AK026327               | Hs.436578         | 4.92         | 0.015017       |
| POLR2H         | U37689                 | Hs.432574         | 4.48         | 0.00719        |
| POLR3E         | AK023160               | Hs.460298         | 7.38         | 0.038259       |
| POU2F1         | BF511210               | Hs.493649         | 5.58         | 0.042384       |
| POU3F1         | NM_002699              | Hs.1837           | 156.53       | 0.033108       |
| POU4F1         | MmuSTS.2078.1.S1_at    | -                 | 251.56       | 0.003          |
| POU4F3         | NM_002700              | Hs.553499         | 8.92         | 0.001946       |
| POU5F1         | MmuSTS.2285.1.S1_at    | -                 | 93.63        | 0.010468       |
| PPM1A          | NM_021003              | Hs.130036         | 4.75         | 0.021625       |
| PRDM15         | AL109788               | Hs.473893         | 15.8         | 0.024444       |
| PRDM2          | AI681013               | Hs.371823         | 12.82        | 5.97E-05       |
| PRDM6          | AF272898               | Hs.135118         | 10.12        | 0.005436       |
| PREB           | AK001976               | Hs.279784         | 6.85         | 0.008362       |
| PRKD2          | AF309082               | Hs.466987         | 19.38        | 0.013671       |
| PRMT8          | NM_019854              | Hs.504530         | 10.19        | 0.007113       |
| PROX1          | AK025453               | Hs.585369         | 11.44        | 0.026479       |
| PTGER3         | AW242315               | Hs.445000         | 19.36        | 0.033621       |

(continued)

SUPPLEMENTARY TABLE S2. (CONTINUED)

| <i>Gene ID</i> | <i>Gene identifier</i> | <i>UG cluster</i> | <i>Ratio</i> | <i>p value</i> |
|----------------|------------------------|-------------------|--------------|----------------|
| <i>PTTG1</i>   | NM_004219              | Hs.350966         | 5.92         | 0.001665       |
| <i>RAB3B</i>   | BC005035               | Hs.123072         | 16.02        | 0.020596       |
| <i>RAB6A</i>   | AI805050               | Hs.707804         | 38.65        | 0.016504       |
| <i>RBAK</i>    | AW138835               | Hs.396178         | 23.56        | 0.003596       |
| <i>RBBP5</i>   | NM_005057              | Hs.519230         | 5.87         | 0.00325        |
| <i>RBM15</i>   | NM_022768              | Hs.435947         | 13.38        | 0.000136       |
| <i>RCOR1</i>   | D31888                 | Hs.510521         | 12.04        | 0.005182       |
| <i>RERE</i>    | NM_012102              | Hs.463041         | 10.72        | 0.003529       |
| <i>RFC3</i>    | BC000149               | Hs.115474         | 21.83        | 0.000533       |
| <i>RFX1</i>    | BF507952               | Hs.655215         | 12.32        | 0.015063       |
| <i>RHEBL1</i>  | BC014155               | Hs.159013         | 36.64        | 0.044465       |
| <i>RIPPLY1</i> | BC007652               | Hs.334726         | 5.64         | 0.046585       |
| <i>RNF10</i>   | NM_014868              | Hs.442798         | 6.41         | 0.0012         |
| <i>RORA</i>    | BC035094               | Hs.655155         | 104.48       | 0.03739        |
| <i>RPL15</i>   | AF279903               | Hs.381219         | 5.25         | 0.011281       |
| <i>RPS6KA5</i> | AF074393               | Hs.510225         | 89.46        | 0.008359       |
| <i>RUNX1T1</i> | X79990                 | Hs.368431         | 18.25        | 0.013221       |
| <i>RYBP</i>    | NM_012234              | Hs.7910           | 8.2          | 0.000833       |
| <i>SAP30</i>   | BF247098               | Hs.591715         | 6.63         | 0.017556       |
| <i>SET</i>     | AV702810               | Hs.436687         | 46.73        | 0.000156       |
| <i>SFRP4</i>   | AW089415               | Hs.658169         | 37.83        | 0.000658       |
| <i>SFRS17A</i> | BC001620               | Hs.522572         | 202.94       | 0.000382       |
| <i>SIN3A</i>   | AI433017               | Hs.513039         | 30.13        | 0.002772       |
| <i>SIN3B</i>   | AB014600               | Hs.13999          | 6.02         | 0.006181       |
| <i>SIVA1</i>   | NM_006427              | Hs.112058         | 7.77         | 0.014483       |
| <i>SIX2</i>    | AF332197               | Hs.101937         | 20.48        | 0.000964       |
| <i>SLBP</i>    | NM_006527              | Hs.298345         | 8.24         | 0.000151       |
| <i>SMAD2</i>   | U65019                 | Hs.12253          | 5.15         | 0.000717       |
| <i>SMARCA2</i> | X72889                 | Hs.298990         | 11.31        | 0.040111       |
| <i>SMARCA4</i> | AI684141               | Hs.327527         | 8.64         | 0.00058        |
| <i>SMARCD1</i> | AI869240               | Hs.79335          | 14.46        | 0.014809       |
| <i>SNAPC2</i>  | NM_003083              | Hs.631860         | 10.41        | 0.003241       |
| <i>SNAPC4</i>  | AK023513               | Hs.113265         | 4.63         | 0.034515       |
| <i>SNAPC5</i>  | BE259395               | Hs.30174          | 13.92        | 0.024364       |
| <i>SOLH</i>    | BF433759               | Hs.632219         | 27.85        | 0.008641       |
| <i>SOX5</i>    | NM_006940              | Hs.657542         | 127.36       | 0.000127       |
| <i>SUB1</i>    | BE784583               | Hs.229641         | 24.31        | 0.005214       |
| <i>SUDS3</i>   | AK024460               | Hs.416630         | 4.91         | 0.001348       |
| <i>SUV39H2</i> | NM_024670              | Hs.554883         | 9.72         | 0.020715       |
| <i>TACC3</i>   | NM_006342              | Hs.104019         | 17.19        | 0.012513       |
| <i>TADA2L</i>  | BC001172               | Hs.500066         | 4.69         | 0.02556        |
| <i>TAF4</i>    | AI744029               | Hs.18857          | 21.26        | 0.000797       |
| <i>TAF4B</i>   | AI366784               | Hs.369519         | 9.19         | 0.001867       |
| <i>TAF5</i>    | AW138827               | Hs.96103          | 20.55        | 0.03202        |
| <i>TAF5L</i>   | R60550                 | Hs.270621         | 5.39         | 0.030441       |
| <i>TAF8</i>    | AF086309               | Hs.520122         | 6.32         | 0.01387        |
| <i>TBP</i>     | NM_003194              | Hs.590872         | 5.88         | 0.003124       |
| <i>TBX19</i>   | NM_005149              | Hs.716656         | 4.94         | 0.014923       |
| <i>TBX5</i>    | BC011028               | Hs.381715         | 14.61        | 0.021817       |
| <i>TCEA2</i>   | NM_003195              | Hs.505004         | 17.23        | 0.010976       |
| <i>TCEA3</i>   | AI675780               | Hs.446354         | 32.47        | 0.01777        |
| <i>TCEANC</i>  | NM_152634              | Hs.222855         | 42.14        | 6.53E-05       |
| <i>TCF3</i>    | M31523                 | Hs.371282         | 9.54         | 0.00823        |
| <i>TEAD2</i>   | BE888180               | Hs.515534         | 6.93         | 0.049037       |
| <i>TESC</i>    | NM_017899              | Hs.525709         | 73.9         | 0.003166       |
| <i>TFEC</i>    | NM_012252              | Hs.125962         | 12.03        | 0.042017       |
| <i>TGIF2LY</i> | AF332223               | Hs.112148         | 27.55        | 0.016908       |
| <i>TOX4</i>    | BE783632               | Hs.555910         | 4.52         | 0.014419       |
| <i>TP63</i>    | NM_003722              | Hs.137569         | 173.59       | 0.008469       |
| <i>TRAK1</i>   | NM_014965              | Hs.535711         | 11.91        | 0.018708       |
| <i>TRERF1</i>  | AJ277276               | Hs.485392         | 10.31        | 0.018184       |
| <i>TRIM29</i>  | NM_012101              | Hs.504115         | 41.65        | 0.031393       |

(continued)

SUPPLEMENTARY TABLE S2. (CONTINUED)

| <i>Gene ID</i> | <i>Gene identifier</i> | <i>UG cluster</i> | <i>Ratio</i> | <i>p value</i> |
|----------------|------------------------|-------------------|--------------|----------------|
| TRIM66         | AI632106               | Hs.130836         | 6.11         | 0.039553       |
| TRMT61B        | NM_017910              | Hs.468026         | 4.65         | 8.76E-06       |
| TTF1           | AI632304               | Hs.54780          | 10.62        | 0.015087       |
| U2AF2          | NM_007279              | Hs.528007         | 6.55         | 0.01719        |
| UBE2N          | BG290646               | Hs.524630         | 8.77         | 0.000136       |
| UHRF1          | AK025578               | Hs.108106         | 4.74         | 0.011503       |
| UPF1           | D86988                 | Hs.515266         | 6.61         | 0.001774       |
| USP2           | NM_004205              | Hs.524085         | 514.28       | 3.36E-05       |
| USP21          | AF217979               | Hs.8015           | 8.86         | 0.03351        |
| USP7           | AI160440               | Hs.706830         | 8.47         | 0.008899       |
| VANGL2         | AB033041               | Hs.99477          | 21.85        | 0.01041        |
| VAV1           | NM_005428              | Hs.116237         | 32.29        | 0.004781       |
| WAPAL          | D87450                 | Hs.203099         | 5.08         | 0.003399       |
| WBSCR22        | NM_017528              | Hs.647063         | 5.73         | 0.001649       |
| WHSC1          | AI770166               | Hs.113876         | 5.9          | 0.001203       |
| YBX2           | NM_015982              | Hs.567494         | 186.55       | 0.021388       |
| ZFP36L1        | AI344045               | Hs.85155          | 8.75         | 0.017369       |
| ZKSCAN2        | AK026852               | Hs.513451         | 52.78        | 0.000277       |
| ZMYND11        | BC034784               | Hs.292265         | 5.17         | 0.001031       |
| ZNF12          | AF505656               | Hs.431471         | 10.07        | 0.011053       |
| ZNF131         | BE972394               | Hs.535804         | 13.75        | 0.016666       |
| ZNF141         | NM_003441              | Hs.654355         | 4.5          | 0.045097       |
| ZNF174         | NM_003450              | Hs.155204         | 6.19         | 0.001123       |
| ZNF195         | AI476267               | Hs.386294         | 23.31        | 0.005205       |
| ZNF202         | N46430                 | Hs.112556         | 7.62         | 0.048987       |
| ZNF211         | NM_006385              | Hs.590977         | 52.9         | 0.00021        |
| ZNF215         | NM_013250              | Hs.523457         | 17.19        | 0.006708       |
| ZNF227         | BF739795               | Hs.371335         | 11.79        | 0.000159       |
| ZNF235         | NM_004234              | Hs.298089         | 4.75         | 0.004051       |
| ZNF250         | BE350026               | Hs.532277         | 9.57         | 0.000871       |
| ZNF253         | NM_021047              | Hs.659321         | 5.86         | 0.046462       |
| ZNF254         | AI983886               | Hs.434406         | 12.99        | 0.012259       |
| ZNF256         | BC001438               | Hs.596242         | 37.63        | 7.50E-05       |
| ZNF257         | AF070651               | Hs.283900         | 336.34       | 0.003157       |
| ZNF26          | NM_019591              | Hs.489608         | 5.24         | 0.033689       |
| ZNF281         | AU150752               | Hs.59757          | 4.82         | 0.002143       |
| ZNF324         | NM_014347              | Hs.515660         | 5.07         | 0.001532       |
| ZNF354A        | NM_005649              | Hs.484324         | 5.8          | 0.00853        |
| ZNF394         | AK022360               | Hs.386324         | 7.14         | 0.000936       |
| ZNF420         | AI339586               | Hs.444992         | 39.61        | 0.03739        |
| ZNF44          | AL137602               | Hs.693933         | 7.44         | 0.023608       |
| ZNF449         | AI888786               | Hs.28780          | 11.26        | 0.001883       |
| ZNF540         | AA013398               | Hs.121283         | 9.57         | 0.001197       |
| ZNF544         | BF510451               | Hs.438994         | 13.21        | 0.033723       |
| ZNF548         | AK057494               | Hs.657353         | 8.08         | 0.017347       |
| ZNF554         | BC000113               | Hs.307043         | 11.86        | 0.010149       |
| ZNF555         | NM_152791              | Hs.47712          | 16.03        | 0.033708       |
| ZNF571         | NM_016536              | Hs.590944         | 17.97        | 0.001514       |
| ZNF582         | BG432829               | Hs.244391         | 4.68         | 0.002586       |
| ZNF585A        | BE550717               | Hs.659236         | 4.89         | 0.015371       |
| ZNF597         | AI825587               | Hs.88630          | 14.18        | 0.005717       |
| ZNF599         | BC033354               | Hs.590961         | 9.04         | 0.000354       |
| ZNF607         | BC005085               | Hs.116622         | 21.91        | 0.029129       |
| ZNF641         | BF541598               | Hs.23492          | 18.34        | 0.001923       |
| ZNF658         | AW874634               | Hs.522147         | 7.36         | 0.014319       |
| ZNF669         | NM_024804              | Hs.163754         | 5.32         | 0.020289       |
| ZNF671         | NM_024833              | Hs.180402         | 9.37         | 0.0057         |
| ZNF689         | W80378                 | Hs.454685         | 34.43        | 0.006791       |
| ZNF708         | BF223715               | Hs.466296         | 11.98        | 0.005103       |
| ZNF747         | NM_023931              | Hs.592032         | 5.01         | 0.009018       |
| ZNF749         | BE892698               | Hs.695781         | 9.96         | 0.008318       |
| ZNF765         | BC001610               | Hs.433293         | 14.51        | 0.019317       |

(continued)

SUPPLEMENTARY TABLE S2. (CONTINUED)

| <i>Gene ID</i> | <i>Gene identifier</i> | <i>UG cluster</i> | <i>Ratio</i> | <i>p value</i> |
|----------------|------------------------|-------------------|--------------|----------------|
| ZNF766         | AA081007               | Hs.439662         | 5.05         | 0.005964       |
| ZNF792         | AV758821               | Hs.50405          | 5.75         | 0.009694       |
| ZNF829         | BF439163               | Hs.124047         | 15.22        | 0.001575       |
| ZNF93          | NM_031218              | Hs.301059         | 56.48        | 0.038554       |
| ZNHIT3         | AI131008               | Hs.2210           | 7.86         | 0.004579       |
| ZRANB2         | AF065392               | Hs.194718         | 4.72         | 0.018793       |
| ZSCAN21        | AL136865               | Hs.632294         | 9.03         | 0.004912       |
| ZSCAN22        | BE794668               | Hs.388162         | 5.77         | 0.004186       |
| ZSCAN23        | AL833347               | Hs.376873         | 13.54        | 0.00651        |
| ZSCAN4         | NM_152677              | Hs.469663         | 54.25        | 0.046847       |

SUPPLEMENTARY TABLE S3. MOUSE PUTATIVE CANDIDATE OOCYTE REPROGRAMMING FACTORS (CORFs)

| <i>Gene ID</i>  | <i>Gene identifier</i> | <i>UG cluster</i> | <i>Ratio</i> | <i>p value</i> |
|-----------------|------------------------|-------------------|--------------|----------------|
| <i>Adnp2</i>    | BC024969               | Mm.26594          | 4.68         | 0.001195       |
| <i>Afap112</i>  | BG068103               | Mm.226284         | 131.94       | 0.005781       |
| <i>Ahr</i>      | BE989096               | Mm.341377         | 26.75        | 0.025319       |
| <i>Alx1</i>     | BB366930               | Mm.19287          | 10.29        | 0.013207       |
| <i>Aof1</i>     | BM243793               | Mm.31259          | 20.51        | 0.002424       |
| <i>Apitd1</i>   | AU043467               | Mm.260893         | 5.87         | 0.040013       |
| <i>Arhgef11</i> | BE957000               | Mm.287267         | 3.84         | 0.010446       |
| <i>Arid2</i>    | AK014481               | Mm.17166          | 12.87        | 0.001748       |
| <i>Arnt</i>     | AU022700               | Mm.250265         | 9.21         | 0.012298       |
| <i>Arntl2</i>   | AY014836               | Mm.442075         | 3.16         | 0.001469       |
| <i>Asf1a</i>    | AK007804               | Mm.272989         | 4.82         | 0.022009       |
| <i>Asf1b</i>    | BC003428               | Mm.29680          | 8.75         | 0.029764       |
| <i>Asxl1</i>    | BI648411               | Mm.330677         | 9.6          | 0.007106       |
| <i>Atf1</i>     | NM_007497              | Mm.676            | 5.55         | 0.004929       |
| <i>Atf2</i>     | BM119623               | Mm.209903         | 6.29         | 0.006742       |
| <i>Atf6</i>     | BB129063               | Mm.377046         | 6.78         | 0.044734       |
| <i>Atf7ip2</i>  | AI429259               | Mm.108729         | 17.24        | 0.015527       |
| <i>Axin2</i>    | NM_015732              | Mm.71710          | 22.47        | 0.004318       |
| <i>Bap1</i>     | AK009033               | Mm.3779           | 4.18         | 0.011875       |
| <i>Baz1b</i>    | BE943572               | Mm.40331          | 10.63        | 0.029781       |
| <i>Bmi1</i>     | M64279                 | Mm.289584         | 21.59        | 0.002906       |
| <i>Bnc1</i>     | U88064                 | Mm.243802         | 34.83        | 0.003454       |
| <i>Bnc2</i>     | BB482899               | Mm.190774         | 13.46        | 0.000242       |
| <i>Bptf</i>     | AA867746               | Mm.343986         | 11.56        | 0.003348       |
| <i>Brd1</i>     | AA930693               | Mm.254438         | 14.45        | 0.015242       |
| <i>Brd7</i>     | NM_012047              | Mm.5400           | 3.2          | 0.010271       |
| <i>Brd8</i>     | AV341197               | Mm.45602          | 13.19        | 0.038399       |
| <i>Brdt</i>     | BG070923               | Mm.182836         | 284.62       | 0.007165       |
| <i>Brwd1</i>    | BM230348               | Mm.240871         | 16.87        | 0.008162       |
| <i>Btf3l4</i>   | AK011367               | Mm.379178         | 4.32         | 0.000102       |
| <i>C79407</i>   | BB540053               | Mm.21144          | 3.57         | 0.023611       |
| <i>Camta1</i>   | BB558154               | Mm.318846         | 40.05        | 0.037939       |
| <i>Cand1</i>    | BB380335               | Mm.203965         | 15.6         | 0.02748        |
| <i>Caprin2</i>  | BE951890               | Mm.150568         | 4.33         | 0.005106       |
| <i>Casp8ap2</i> | NM_011997              | Mm.22279          | 11.98        | 0.00021        |
| <i>Cbfa2t3</i>  | NM_009824              | Mm.194339         | 4.53         | 0.010288       |
| <i>Cbx2</i>     | BI693188               | Mm.14547          | 5.94         | 0.014069       |
| <i>Ccar1</i>    | AW538049               | Mm.196371         | 3.55         | 0.000462       |
| <i>Ccdc76</i>   | BG085812               | Mm.259648         | 13.54        | 0.008103       |
| <i>Ccdc79</i>   | BG067871               | Mm.249775         | 27.66        | 0.001083       |
| <i>Ccnl2</i>    | AK008585               | Mm.23492          | 6            | 0.042259       |
| <i>Cdca8</i>    | AV307110               | Mm.28038          | 8.99         | 0.007016       |
| <i>Cdk8</i>     | BC025046               | Mm.260576         | 9.36         | 0.003395       |
| <i>Cdyl</i>     | AF081260               | Mm.29002          | 4.78         | 0.002345       |
| <i>Cebpg</i>    | AB012273               | Mm.273090         | 4.6          | 0.001246       |
| <i>Chd4</i>     | BM502696               | Mm.333388         | 11.17        | 0.000358       |
| <i>Chd7</i>     | BB127276               | Mm.138792         | 134.24       | 0.000567       |
| <i>Chd8</i>     | BB409788               | Mm.289934         | 5.28         | 0.000195       |
| <i>Clock</i>    | BB203106               | Mm.3552           | 3.39         | 0.001001       |
| <i>Cnot2</i>    | AA967305               | Mm.351553         | 9.71         | 0.003154       |
| <i>Cnot4</i>    | AI448404               | Mm.214525         | 8.69         | 0.000743       |
| <i>Cnot6l</i>   | BC018506               | Mm.28374          | 21.09        | 0.012255       |
| <i>Cnot7</i>    | BC006021               | Mm.272551         | 13.96        | 6.24E-06       |
| <i>Creb3l4</i>  | BC022605               | Mm.299952         | 19.8         | 0.044357       |
| <i>Crebbp</i>   | BG069466               | Mm.132238         | 9.01         | 0.00325        |
| <i>Crtc1</i>    | BE986758               | Mm.227767         | 3.94         | 0.016505       |
| <i>Cry1</i>     | BG069864               | Mm.26237          | 21.11        | 0.0031         |
| <i>Crym</i>     | NM_016669              | Mm.9114           | 6.11         | 0.016212       |
| <i>Csrp2bp</i>  | C86984                 | Mm.227925         | 3.24         | 0.004005       |
| <i>Ctbp2</i>    | BG072903               | Mm.246240         | 3.55         | 0.000621       |
| <i>Ctcf</i>     | BB836888               | Mm.269474         | 6.32         | 0.045165       |
| <i>Cttnbip1</i> | BF457754               | Mm.299735         | 4.4          | 0.016796       |

(continued)

SUPPLEMENTARY TABLE S3. (CONTINUED)

| Gene ID        | Gene identifier | UG cluster | Ratio  | p value  |
|----------------|-----------------|------------|--------|----------|
| <i>Dcp1a</i>   | BG069232        | Mm.28733   | 69.15  | 0.038137 |
| <i>Dedd</i>    | AK006814        | Mm.270139  | 3.24   | 9.93E-05 |
| <i>Dip2b</i>   | BB795504        | Mm.243658  | 4.12   | 0.004202 |
| <i>Dmrtc1a</i> | AK014934        | Mm.29672   | 4.83   | 0.001346 |
| <i>Dnajb6</i>  | AK005680        | Mm.290110  | 9.68   | 0.00648  |
| <i>Dnajc1</i>  | NM_007869       | Mm.246674  | 3.02   | 0.022831 |
| <i>Dnmt1</i>   | BB116018        | Mm.128580  | 11.03  | 0.019468 |
| <i>Dnmt3a</i>  | BB795491        | Mm.5001    | 74.05  | 0.007655 |
| <i>Dnmt3b</i>  | NM_010068       | Mm.89772   | 15.95  | 0.019794 |
| <i>Dnmt3l</i>  | AF220524        | Mm.13433   | 9.76   | 0.018424 |
| <i>Dpf1</i>    | AW553317        | Mm.101885  | 3.97   | 0.019418 |
| <i>Dppa2</i>   | AK010743        | Mm.27857   | 71.29  | 0.045383 |
| <i>Dppa3</i>   | AY082485        | Mm.27982   | 112.33 | 0.011139 |
| <i>Dppa5a</i>  | NM_025274       | Mm.139314  | 3.32   | 0.027336 |
| <i>Dpy30</i>   | BC002240        | Mm.28536   | 4.3    | 0.035017 |
| <i>E2f1</i>    | NM_007891       | Mm.18036   | 11.99  | 0.003049 |
| <i>E2f2</i>    | BB543028        | Mm.307932  | 83.03  | 0.006327 |
| <i>E2f5</i>    | BC003220        | Mm.153415  | 21.07  | 0.001358 |
| <i>Eed</i>     | U97675          | Mm.380914  | 6.49   | 0.000925 |
| <i>Efcab6</i>  | AK016516        | Mm.196288  | 8.41   | 0.008019 |
| <i>Egln1</i>   | BE995700        | Mm.140619  | 7.21   | 0.001585 |
| <i>Ehf</i>     | BC008249        | Mm.10724   | 320.79 | 0.014531 |
| <i>Elf5</i>    | BC012424        | Mm.20888   | 4.32   | 0.012088 |
| <i>Ell</i>     | BB139475        | Mm.271973  | 6.1    | 0.003537 |
| <i>Ell3</i>    | BI660702        | Mm.330522  | 8.2    | 0.01571  |
| <i>Elof1</i>   | BC024488        | Mm.29801   | 20.37  | 0.006257 |
| <i>Ep400</i>   | AU023439        | Mm.270487  | 14.5   | 0.000305 |
| <i>Erg</i>     | AV329219        | Mm.164531  | 119.46 | 0.001123 |
| <i>Ern1</i>    | BG075179        | Mm.340943  | 58.88  | 0.001795 |
| <i>Esrrg</i>   | BM120846        | Mm.89989   | 23.25  | 0.043777 |
| <i>Etv1</i>    | NM_007960       | Mm.4866    | 4.83   | 0.001164 |
| <i>Eya1</i>    | BB760085        | Mm.250185  | 7.09   | 0.002376 |
| <i>Eya3</i>    | BB428881        | Mm.227733  | 3.32   | 0.039402 |
| <i>Eya4</i>    | BB476944        | Mm.332128  | 6.38   | 0.0349   |
| <i>Ezh1</i>    | NM_007970       | Mm.5027    | 8.33   | 0.026131 |
| <i>Ezh2</i>    | NM_007971       | Mm.246688  | 17.11  | 0.000302 |
| <i>Fam175a</i> | AK014420        | Mm.221269  | 3.35   | 0.041077 |
| <i>Figla</i>   | NM_012013       | Mm.8024    | 3.71   | 0.040215 |
| <i>Foxj3</i>   | BM240405        | Mm.259227  | 19.48  | 0.021178 |
| <i>Foxk1</i>   | BB794583        | Mm.24214   | 6.43   | 0.018354 |
| <i>Foxk2</i>   | BM206907        | Mm.209750  | 4.49   | 0.042737 |
| <i>Foxn3</i>   | BM196962        | Mm.341972  | 9.4    | 0.012734 |
| <i>Foxo1</i>   | AW121569        | Mm.29891   | 25.54  | 0.028746 |
| <i>Foxo3</i>   | NM_019740       | Mm.338613  | 11.58  | 0.000838 |
| <i>Foxp2</i>   | AV322952        | Mm.332919  | 3.06   | 0.002568 |
| <i>Ftsjd1</i>  | BC025546        | Mm.275341  | 8.83   | 0.000462 |
| <i>Gata3</i>   | NM_008091       | Mm.313866  | 119.22 | 0.000165 |
| <i>Gata4</i>   | NM_008092       | Mm.247669  | 4.22   | 0.037061 |
| <i>Gatad2b</i> | AF411837        | Mm.270999  | 31.3   | 0.00102  |
| <i>Gbx2</i>    | L39770          | Mm.204730  | 6.36   | 0.000863 |
| <i>Gcm2</i>    | AF081556        | Mm.1399    | 18.8   | 0.001656 |
| <i>Gli2</i>    | AW546128        | Mm.273292  | 3.11   | 0.017472 |
| <i>Gmcl1</i>   | AF163665        | Mm.321452  | 6.41   | 0.025595 |
| <i>Gmeb1</i>   | BM935323        | Mm.103489  | 4.4    | 0.00118  |
| <i>Gmnn</i>    | NM_020567       | Mm.12239   | 3.71   | 0.012029 |
| <i>Gpbp1</i>   | BE912643        | Mm.57286   | 3.9    | 0.007456 |
| <i>Grhl1</i>   | BC013080        | Mm.263068  | 457.5  | 0.019777 |
| <i>Gsg2</i>    | BE457839        | Mm.42045   | 15.14  | 0.001594 |
| <i>Gtf2a1</i>  | BI689897        | Mm.275728  | 8.3    | 0.002376 |
| <i>Gtf2a1l</i> | NM_023630       | Mm.61330   | 23.11  | 0.002396 |
| <i>Gtf2b</i>   | BC016637        | Mm.271756  | 12.39  | 2.07E-06 |
| <i>Gtf3c2</i>  | AV297256        | Mm.271923  | 3.85   | 0.002939 |

(continued)



SUPPLEMENTARY TABLE S3. (CONTINUED)

| Gene ID | Gene identifier | UG cluster | Ratio  | p value  |
|---------|-----------------|------------|--------|----------|
| Gzf1    | AV231413        | Mm.136913  | 4.1    | 0.006587 |
| H1foo   | NM_138311       | Mm.21899   | 482.95 | 0.036366 |
| Hdac6   | NM_010413       | Mm.29854   | 3.46   | 0.011104 |
| Hdac9   | BB750646        | Mm.310551  | 226.99 | 0.00256  |
| Hells   | NM_008234       | Mm.57223   | 3.88   | 0.003441 |
| Hhex    | AK014111        | Mm.33896   | 7.38   | 0.006713 |
| Hic2    | BB292220        | Mm.261602  | 17.58  | 0.019234 |
| Hif3a   | C87687          | Mm.135110  | 69.55  | 0.02542  |
| Hipk2   | AK016742        | Mm.23790   | 6.76   | 0.02285  |
| Hivep1  | NM_007772       | Mm.4808    | 4.86   | 0.003348 |
| Hlcs    | AB066227        | Mm.30921   | 5.07   | 0.028782 |
| Hmg20a  | NM_025812       | Mm.150856  | 5.01   | 0.022216 |
| Hnf1b   | AB008174        | Mm.7226    | 4.58   | 0.036009 |
| Hnmt    | NM_080462       | Mm.33120   | 105.3  | 0.013629 |
| Hoxa7   | NM_010455       | Mm.294826  | 4.55   | 0.005396 |
| Hsf2bp  | AK016553        | Mm.75856   | 34.03  | 0.007395 |
| Hsf5    | BG075885        | Mm.390371  | 6.46   | 0.009743 |
| Hurve1  | BM248615        | Mm.27372   | 13.67  | 0.001159 |
| Ikzf2   | NM_011770       | Mm.106343  | 11.77  | 0.000359 |
| Ikzf4   | BG071647        | Mm.358648  | 459.05 | 0.002234 |
| Ilf3    | NM_010561       | Mm.440026  | 15.71  | 0.005163 |
| Ing1    | BC016573        | Mm.25709   | 7.71   | 8.50E-05 |
| Ing3    | BB020556        | Mm.39999   | 13.21  | 0.004807 |
| Ino80   | BM238259        | Mm.330496  | 7.65   | 0.001432 |
| Irf8    | BG069095        | Mm.334861  | 20.13  | 0.001452 |
| Jarid2  | NM_021878       | Mm.25059   | 21.17  | 0.004008 |
| Jhdm1d  | BG067970        | Mm.293175  | 16.94  | 0.003536 |
| Kcnh1   | BM120185        | Mm.4489    | 18.59  | 0.000517 |
| Kdm1    | AK007763        | Mm.28540   | 3.29   | 0.009208 |
| Kdm2b   | AF176524        | Mm.86406   | 4.33   | 0.006101 |
| Kdm5b   | BB361206        | Mm.28995   | 3.21   | 0.014655 |
| Kdm5c   | BB376389        | Mm.142655  | 3.64   | 0.006948 |
| Kdm6a   | AJ002730        | Mm.257498  | 15.63  | 0.00586  |
| Kdm6b   | BG228765        | Mm.261201  | 16.75  | 2.09E-05 |
| Khsrp   | BB332580        | Mm.34296   | 3.69   | 0.009369 |
| Klf11   | BB137387        | Mm.9616    | 3.35   | 0.006963 |
| Klf17   | AU022735        | Mm.3848    | 445.92 | 0.011848 |
| Kpna2   | NM_010655       | Mm.12508   | 4.98   | 0.02677  |
| L3mbtl3 | BB022070        | Mm.338439  | 5.26   | 0.000662 |
| Lass5   | AY029533        | Mm.390821  | 5.02   | 0.000874 |
| Lbx1    | BB248430        | Mm.116815  | 8.46   | 0.033968 |
| Lef1    | AV156352        | Mm.255219  | 6.91   | 0.027006 |
| Lhx2    | NM_010710       | Mm.142856  | 32.18  | 0.024023 |
| Lhx8    | D49658          | Mm.15530   | 25.91  | 0.045533 |
| Lin28   | BB706377        | Mm.302567  | 231.01 | 0.003235 |
| Lin54   | BG073348        | Mm.212568  | 5.7    | 0.000221 |
| Lmo1    | NM_057173       | Mm.360145  | 25.94  | 0.018273 |
| Lpin2   | AK021389        | Mm.227924  | 11.49  | 0.023615 |
| Lrch4   | BC012525        | Mm.200763  | 37.06  | 0.001293 |
| Lrrfip1 | BG069059        | Mm.45039   | 9.07   | 0.000137 |
| Lztfl1  | NM_033322       | Mm.378263  | 6.44   | 0.016538 |
| Mael    | AV279061        | Mm.26189   | 81.61  | 0.045031 |
| Maf1    | AU042856        | Mm.289680  | 3.1    | 0.024332 |
| Mapk8   | AW909414        | Mm.21495   | 44.56  | 0.002863 |
| Max     | AA617392        | Mm.268548  | 3.23   | 0.012398 |
| Mbd5    | BB086698        | Mm.440436  | 7.56   | 0.015688 |
| Mbt1    | NM_134012       | Mm.210334  | 23.51  | 0.017349 |
| Mbtps2  | BB264953        | Mm.37577   | 5.24   | 0.008133 |
| Mcm5    | NM_008566       | Mm.5048    | 14.24  | 0.002723 |
| Mcm7    | BB464359        | Mm.378965  | 4.02   | 0.018174 |
| Mdm4    | BQ173933        | Mm.472773  | 48.69  | 0.000256 |
| Med12l  | BG071747        | Mm.240059  | 25.58  | 0.016864 |

(continued)

SUPPLEMENTARY TABLE S3. (CONTINUED)

| <i>Gene ID</i>  | <i>Gene identifier</i> | <i>UG cluster</i> | <i>Ratio</i> | <i>p value</i> |
|-----------------|------------------------|-------------------|--------------|----------------|
| <i>Med14</i>    | AB019028               | Mm.17616          | 8.21         | 8.67E-05       |
| <i>Med23</i>    | AK013854               | Mm.28020          | 3.22         | 0.016307       |
| <i>Med31</i>    | NM_026068              | Mm.159496         | 12.63        | 0.025216       |
| <i>Med4</i>     | NM_026119              | Mm.282888         | 4.92         | 0.001734       |
| <i>Med7</i>     | NM_025426              | Mm.24159          | 15.58        | 0.013913       |
| <i>Med8</i>     | AI506534               | Mm.259567         | 4.24         | 0.018895       |
| <i>Meis2</i>    | U68384                 | Mm.247566         | 11.94        | 0.020312       |
| <i>Mesp2</i>    | NM_008589              | Mm.31472          | 16.03        | 0.02065        |
| <i>Mett5d1</i>  | AK002682               | Mm.330451         | 3.09         | 0.02079        |
| <i>Mettl3</i>   | AW556332               | Mm.271759         | 5.76         | 0.020874       |
| <i>Mettl4</i>   | BB701076               | Mm.139146         | 16.89        | 0.003527       |
| <i>Mettl7a1</i> | AV171622               | Mm.477986         | 21.55        | 0.003749       |
| <i>Mier2</i>    | BC005748               | Mm.334193         | 7.87         | 0.021342       |
| <i>Mkrn1</i>    | AA717142               | Mm.270484         | 7.56         | 0.000618       |
| <i>Mlf1ip</i>   | BB667813               | Mm.22108          | 4.94         | 0.002622       |
| <i>Mill2</i>    | BG922679               | Mm.425955         | 40.47        | 0.000119       |
| <i>Mill3</i>    | AV297525               | Mm.332268         | 40.95        | 0.00329        |
| <i>Millt10</i>  | BB353133               | Mm.209175         | 17.84        | 0.002284       |
| <i>Millt3</i>   | AK011386               | Mm.288898         | 13.67        | 0.002333       |
| <i>Mlxip</i>    | AF265663               | Mm.83277          | 3.31         | 0.020845       |
| <i>Morf4l1</i>  | BM115860               | Mm.477470         | 3.63         | 0.032867       |
| <i>Mospd1</i>   | BC018329               | Mm.476015         | 6.22         | 0.018488       |
| <i>Msl1</i>     | AW495537               | Mm.258352         | 4.3          | 0.023389       |
| <i>Msl2</i>     | BB745314               | Mm.436586         | 34.2         | 0.009533       |
| <i>Msl3</i>     | NM_010832              | Mm.475716         | 7.2          | 0.004095       |
| <i>Mta3</i>     | BC022124               | Mm.277668         | 8.71         | 0.030631       |
| <i>Mtf1</i>     | BE980297               | Mm.272397         | 11.38        | 0.004056       |
| <i>Musk</i>     | U37709                 | Mm.16148          | 22.56        | 0.016678       |
| <i>Mybl1</i>    | L35261                 | Mm.479            | 3.3          | 0.04941        |
| <i>Mybl2</i>    | AV095095               | Mm.4594           | 9            | 0.015199       |
| <i>Mycbp2</i>   | AW107633               | Mm.6478           | 461.56       | 0.002968       |
| <i>Mynn</i>     | AK019238               | Mm.200378         | 56.66        | 0.013545       |
| <i>Myt1l</i>    | BM116113               | Mm.253067         | 7.68         | 0.027529       |
| <i>Nap1l3</i>   | NM_138742              | Mm.477865         | 9.63         | 0.002228       |
| <i>Nap1l4</i>   | NM_008672              | Mm.294625         | 4.68         | 0.022026       |
| <i>Nat14</i>    | BB702376               | Mm.42652          | 20.69        | 0.009898       |
| <i>Ncoa1</i>    | NM_010881              | Mm.301039         | 3.06         | 0.000819       |
| <i>Ncoa2</i>    | BM234716               | Mm.2537           | 26.1         | 0.049665       |
| <i>Ncoa3</i>    | AI428254               | Mm.476883         | 16.16        | 0.0114         |
| <i>Neo1</i>     | BB350308               | Mm.42249          | 10.98        | 0.005348       |
| <i>Nfatc2</i>   | AF289078               | Mm.116802         | 8.09         | 0.032137       |
| <i>Nfatc2ip</i> | U76759                 | Mm.1389           | 5.83         | 0.022827       |
| <i>Nfkbiz</i>   | AB026551               | Mm.247272         | 5.55         | 0.001783       |
| <i>Nfxl1</i>    | NM_133921              | Mm.187453         | 27.03        | 0.006861       |
| <i>Nfya</i>     | D78642                 | Mm.4929           | 6.42         | 0.000471       |
| <i>Nfyc</i>     | BC020117               | Mm.435590         | 3.21         | 0.009894       |
| <i>Ngdn</i>     | BB559925               | Mm.21214          | 6.58         | 0.007305       |
| <i>Nobox</i>    | AY061761               | Mm.17715          | 9.16         | 0.006981       |
| <i>Npas2</i>    | BG070037               | Mm.2380           | 13.36        | 0.013451       |
| <i>Npas3</i>    | BB391772               | Mm.247044         | 10.38        | 0.036745       |
| <i>Nr2e1</i>    | BB280339               | Mm.287100         | 118.25       | 0.001935       |
| <i>Nr5a2</i>    | NM_030676              | Mm.16794          | 26.31        | 0.006235       |
| <i>Nr6a1</i>    | AK007201               | Mm.439703         | 27.42        | 0.001826       |
| <i>Nsd1</i>     | BM945177               | Mm.168965         | 3.54         | 0.00283        |
| <i>Nsun4</i>    | AW701004               | Mm.282560         | 26.14        | 0.021743       |
| <i>Nsun5</i>    | C80273                 | Mm.281189         | 3.79         | 0.002203       |
| <i>Ogt</i>      | AF363030               | Mm.474838         | 3.79         | 0.033663       |
| <i>Onecut1</i>  | BG067274               | Mm.303355         | 110.39       | 0.002802       |
| <i>Ovol1</i>    | BC021411               | Mm.280225         | 3.38         | 0.02566        |
| <i>Papolg</i>   | BC019635               | Mm.61064          | 36.57        | 0.044854       |
| <i>Pbx2</i>     | NM_017463              | Mm.390957         | 62.79        | 0.001471       |
| <i>Pcbd1</i>    | NM_025273              | Mm.39473          | 47.68        | 0.002421       |

(continued)

SUPPLEMENTARY TABLE S3. (CONTINUED)

| Gene ID         | Gene identifier | UG cluster | Ratio   | p value  |
|-----------------|-----------------|------------|---------|----------|
| <i>Pcgf1</i>    | BG068910        | Mm.12261   | 7.17    | 0.015034 |
| <i>Pcgf6</i>    | BC016195        | Mm.35413   | 7.9     | 0.017254 |
| <i>Pcid2</i>    | BB309550        | Mm.103427  | 9.36    | 0.016658 |
| <i>Pdcd7</i>    | NM_016688       | Mm.476827  | 17.99   | 0.024397 |
| <i>Pde8a</i>    | BB220000        | Mm.458069  | 3.29    | 0.019708 |
| <i>Per3</i>     | NM_011067       | Mm.121361  | 16.7    | 0.000105 |
| <i>Phf1</i>     | NM_009343       | Mm.258953  | 6.22    | 0.025406 |
| <i>Phf15</i>    | BI663145        | Mm.259996  | 18.43   | 0.01406  |
| <i>Phf20</i>    | BB308157        | Mm.427078  | 8.68    | 0.000518 |
| <i>Phf8</i>     | BB042885        | Mm.17156   | 5.48    | 0.0303   |
| <i>Phf2</i>     | BM228625        | Mm.86410   | 35.94   | 0.001047 |
| <i>Pias1</i>    | BM246045        | Mm.478010  | 32.76   | 0.00773  |
| <i>Pias4</i>    | BI412631        | Mm.34428   | 5.9     | 0.016759 |
| <i>Plag1</i>    | NM_019969       | Mm.331467  | 42.33   | 0.021761 |
| <i>Pnn</i>      | AV135835        | Mm.22347   | 9.88    | 0.015623 |
| <i>Pole4</i>    | BF577544        | Mm.195753  | 21.09   | 0.000321 |
| <i>Polr2c</i>   | NM_009090       | Mm.292492  | 5.65    | 0.017569 |
| <i>Pou2f1</i>   | X56230          | Mm.245261  | 3.23    | 0.024733 |
| <i>Pou2f2</i>   | X57939          | Mm.208700  | 3.74    | 0.024982 |
| <i>Pou4f1</i>   | BB465134        | Mm.246550  | 143.01  | 0.006493 |
| <i>Pou5f1</i>   | NM_013633       | Mm.17031   | 44.28   | 0.003049 |
| <i>Ppara</i>    | AV282267        | Mm.212789  | 12.41   | 0.007474 |
| <i>Ppargc1b</i> | NM_133249       | Mm.415302  | 10.21   | 0.013955 |
| <i>Ppp1r10</i>  | BC004771        | Mm.29385   | 13.06   | 0.007988 |
| <i>Prdm4</i>    | AK013393        | Mm.25307   | 3.93    | 0.045252 |
| <i>Prkcb</i>    | BF660388        | Mm.207496  | 6.33    | 0.017058 |
| <i>Prmt2</i>    | NM_133182       | Mm.32020   | 4.64    | 0.00661  |
| <i>Prpf6</i>    | BB085604        | Mm.292001  | 9.41    | 0.021756 |
| <i>Psip1</i>    | NM_133948       | Mm.105331  | 10.38   | 0.000545 |
| <i>Rb1</i>      | NM_009029       | Mm.273862  | 9.24    | 0.000543 |
| <i>Rbak</i>     | BB446066        | Mm.320419  | 3.77    | 0.007524 |
| <i>Rbbp7</i>    | BC003785        | Mm.270186  | 4.91    | 1.69E-05 |
| <i>Rbm14</i>    | BB730281        | Mm.276338  | 5.04    | 0.013448 |
| <i>Rbm15</i>    | AV277021        | Mm.27966   | 3.4     | 0.040391 |
| <i>Rbm38</i>    | NM_019547       | Mm.3865    | 69.16   | 0.008988 |
| <i>Rfx2</i>     | BC004654        | Mm.102     | 17.12   | 0.01605  |
| <i>Rfx5</i>     | BB392192        | Mm.24308   | 17.98   | 0.038045 |
| <i>Rif1</i>     | AK018316        | Mm.254530  | 16.09   | 0.001253 |
| <i>Rnf141</i>   | AV024351        | Mm.96867   | 20.27   | 0.000163 |
| <i>Rnf2</i>     | BC020122        | Mm.441344  | 5.46    | 0.001589 |
| <i>Rnf20</i>    | AW540162        | Mm.24765   | 5.99    | 9.80E-05 |
| <i>Rnf8</i>     | BC021778        | Mm.305994  | 9.13    | 0.000394 |
| <i>Rnmt</i>     | AK015403        | Mm.27544   | 6.24    | 0.002949 |
| <i>Rps6ka5</i>  | BE946999        | Mm.220417  | 8.44    | 0.021579 |
| <i>Rreb1</i>    | BG143502        | Mm.132634  | 14.4    | 0.023482 |
| <i>Rsc1a1</i>   | NM_023544       | Mm.478119  | 7.06    | 0.019131 |
| <i>Runx1t1</i>  | BG072085        | Mm.4909    | 13.89   | 0.01273  |
| <i>Sall4</i>    | BG064756        | Mm.434054  | 1074.28 | 0.000749 |
| <i>Sap30</i>    | NM_021788       | Mm.118     | 40.45   | 0.005816 |
| <i>Sap30l</i>   | BI152383        | Mm.340083  | 3.36    | 0.017956 |
| <i>Scap</i>     | BI412871        | Mm.288741  | 6.61    | 0.006234 |
| <i>Setd6</i>    | AK010304        | Mm.261321  | 4.03    | 0.030773 |
| <i>Setdb1</i>   | AY091600        | Mm.477473  | 29.84   | 0.005981 |
| <i>Sfmbt1</i>   | AV214764        | Mm.294662  | 11.51   | 0.005824 |
| <i>Sfpq</i>     | BF224766        | Mm.257276  | 3.4     | 0.000905 |
| <i>Shprh</i>    | BB539406        | Mm.133101  | 5.66    | 0.000833 |
| <i>Sin3a</i>    | AW553200        | Mm.15755   | 42.43   | 0.033658 |
| <i>Siva1</i>    | AF033112        | Mm.289812  | 4.73    | 0.01379  |
| <i>Six6os1</i>  | BB282393        | Mm.242892  | 3.74    | 0.048089 |
| <i>Skap1</i>    | BG075562        | Mm.395840  | 21.45   | 0.017905 |
| <i>Smad3</i>    | BI646741        | Mm.7320    | 17.94   | 3.27E-05 |
| <i>Smad4</i>    | AK004804        | Mm.100399  | 6.2     | 0.011286 |

(continued)

SUPPLEMENTARY TABLE S3. (CONTINUED)

| <i>Gene ID</i>  | <i>Gene identifier</i> | <i>UG cluster</i> | <i>Ratio</i> | <i>p value</i> |
|-----------------|------------------------|-------------------|--------------|----------------|
| <i>Smarcd2</i>  | NM_031878              | Mm.21772          | 7.28         | 0.003483       |
| <i>Smyd1</i>    | C78565                 | Mm.234274         | 8.23         | 0.041016       |
| <i>Snapc1</i>   | AK012317               | Mm.25937          | 3.11         | 0.006163       |
| <i>Snw1</i>     | C79000                 | Mm.271174         | 3.49         | 0.045683       |
| <i>Sox6</i>     | AJ010605               | Mm.323365         | 7.56         | 2.02E-05       |
| <i>Sox8</i>     | AV345303               | Mm.258220         | 3.72         | 0.013202       |
| <i>Ssbp2</i>    | NM_024186              | Mm.343095         | 4.1          | 0.01757        |
| <i>St18</i>     | BB178719               | Mm.234612         | 82.18        | 0.001635       |
| <i>Stat4</i>    | NM_011487              | Mm.1550           | 8.92         | 0.002174       |
| <i>Stk36</i>    | AK007188               | Mm.310974         | 11.4         | 0.034527       |
| <i>Sufu</i>     | AJ308624               | Mm.41210          | 4.33         | 0.004401       |
| <i>Suv39h2</i>  | BB440055               | Mm.128273         | 60.51        | 0.006916       |
| <i>Suz12</i>    | AW536442               | Mm.283410         | 5.55         | 0.015031       |
| <i>Tada2l</i>   | BB440612               | Mm.45159          | 3.08         | 0.009601       |
| <i>Taf13</i>    | NM_025444              | Mm.24431          | 5.85         | 0.000323       |
| <i>Taf1a</i>    | NM_021466              | Mm.383556         | 14.52        | 0.034871       |
| <i>Taf3</i>     | AV316700               | Mm.86343          | 23.59        | 0.010549       |
| <i>Taf4a</i>    | BE632382               | Mm.235542         | 4.71         | 0.000649       |
| <i>Taf4b</i>    | AV373814               | Mm.312233         | 4.18         | 0.041154       |
| <i>Taf5</i>     | AV117817               | Mm.301522         | 21.08        | 0.001493       |
| <i>Taf7</i>     | BB551747               | Mm.236009         | 39.03        | 0.000208       |
| <i>Taf9b</i>    | AW555571               | Mm.19440          | 15.73        | 0.005007       |
| <i>Tarbp2</i>   | BE373492               | Mm.291485         | 3.27         | 0.041752       |
| <i>Tax1bp1</i>  | C85320                 | Mm.389757         | 22.44        | 0.001261       |
| <i>Tbl1xr1</i>  | NM_030732              | Mm.202966         | 4.93         | 0.017565       |
| <i>Tbx19</i>    | BG069348               | Mm.190649         | 7.99         | 0.035397       |
| <i>Tbx4</i>     | AV226212               | Mm.275336         | 305.37       | 0.001024       |
| <i>Tcea3</i>    | BC010807               | Mm.112            | 12.36        | 0.023147       |
| <i>Tcf20</i>    | AW552808               | Mm.252156         | 28.99        | 0.002594       |
| <i>Tcf7</i>     | AI323642               | Mm.31630          | 6.36         | 0.002121       |
| <i>Tcfap2c</i>  | BC003778               | Mm.3629           | 89.75        | 0.004598       |
| <i>Tcfap2e</i>  | C88013                 | Mm.331881         | 234.79       | 0.012458       |
| <i>Tcl1</i>     | NM_009337              | Mm.18154          | 86.75        | 0.003363       |
| <i>Tesc</i>     | NM_021344              | Mm.273285         | 599.57       | 0.021338       |
| <i>Timeless</i> | BM230269               | Mm.6458           | 11.21        | 0.022736       |
| <i>Tlk2</i>     | NM_011903              | Mm.126976         | 4.11         | 0.006536       |
| <i>Top1</i>     | BG068053               | Mm.217233         | 7.73         | 5.02E-05       |
| <i>Trim27</i>   | NM_009054              | Mm.314056         | 3.84         | 0.001735       |
| <i>Trim33</i>   | BE915274               | Mm.195036         | 3.71         | 0.005918       |
| <i>Trp53bp1</i> | AJ414734               | Mm.215389         | 58.21        | 0.002002       |
| <i>Trp63</i>    | NM_011641              | Mm.20894          | 6.03         | 0.003756       |
| <i>Trps1</i>    | NM_032000              | Mm.30466          | 33.89        | 0.026943       |
| <i>Tsc22d1</i>  | AF201285               | Mm.153272         | 6.09         | 0.000877       |
| <i>Tshz2</i>    | AW556161               | Mm.315789         | 11.83        | 0.000618       |
| <i>Tspyl4</i>   | BC017540               | Mm.21485          | 23.04        | 0.002219       |
| <i>Ttll5</i>    | AK009255               | Mm.132172         | 4.37         | 0.010882       |
| <i>Txnip</i>    | AF173681               | Mm.410189         | 23.45        | 0.000583       |
| <i>Uba3</i>     | AW210753               | Mm.277626         | 4.03         | 0.007187       |
| <i>Ubn1</i>     | BB463209               | Mm.66356          | 10.92        | 0.026559       |
| <i>Ubp1</i>     | BB550053               | Mm.28052          | 7.45         | 0.002779       |
| <i>Uhrf1</i>    | BB702754               | Mm.42196          | 8.43         | 0.002038       |
| <i>Usp2</i>     | AI553394               | Mm.272770         | 37.1         | 0.00202        |
| <i>Usp7</i>     | BB354576               | Mm.295330         | 38.12        | 0.005227       |
| <i>Wapal</i>    | BM230523               | Mm.27957          | 5.76         | 0.011936       |
| <i>Wasl</i>     | BF466143               | Mm.1574           | 34.2         | 0.000314       |
| <i>Wbp7</i>     | AK011392               | Mm.168688         | 14.8         | 8.26E-06       |
| <i>Wdr5</i>     | AV095579               | Mm.28265          | 8.84         | 0.005362       |
| <i>Wdr92</i>    | BB017703               | Mm.298132         | 14.15        | 0.017381       |
| <i>Wwp2</i>     | AK004087               | Mm.390058         | 14.4         | 0.011423       |
| <i>Yap1</i>     | NM_009534              | Mm.221992         | 8            | 0.00177        |
| <i>Ywhab</i>    | NM_018753              | Mm.477730         | 8.31         | 0.003045       |
| <i>Zbtb10</i>   | BG068032               | Mm.103262         | 7.21         | 0.009237       |

(continued)

SUPPLEMENTARY TABLE S3. (CONTINUED)

| <i>Gene ID</i>  | <i>Gene identifier</i> | <i>UG cluster</i> | <i>Ratio</i> | <i>p value</i> |
|-----------------|------------------------|-------------------|--------------|----------------|
| <i>Zbtb24</i>   | BM232143               | Mm.258475         | 3.58         | 0.017186       |
| <i>Zbtb46</i>   | BG073185               | Mm.307728         | 10.34        | 0.011814       |
| <i>Zbtb8b</i>   | BQ175933               | Mm.458339         | 42.99        | 0.000438       |
| <i>Zc3h8</i>    | NM_020594              | Mm.11675          | 7.69         | 0.019609       |
| <i>Zfp318</i>   | BM114753               | Mm.439916         | 6.28         | 0.003447       |
| <i>Zfp354b</i>  | AF184112               | Mm.74670          | 7.68         | 0.002919       |
| <i>Zfp449</i>   | BE993413               | Mm.207345         | 3.72         | 0.022055       |
| <i>Zfp451</i>   | BC024435               | Mm.289103         | 4.7          | 0.003716       |
| <i>Zfp46</i>    | BC006587               | Mm.1504           | 4.62         | 0.005758       |
| <i>Zfp473</i>   | AV277242               | Mm.382935         | 15.19        | 0.037032       |
| <i>Zfp518</i>   | AK018187               | Mm.313523         | 16.37        | 0.034232       |
| <i>Zfp541</i>   | BF018747               | Mm.290718         | 28.93        | 0.027185       |
| <i>Zfp57</i>    | BB549686               | Mm.305561         | 92.65        | 3.69E-05       |
| <i>Zfp574</i>   | BF318389               | Mm.455807         | 6.31         | 0.010371       |
| <i>Zfp592</i>   | BB478535               | Mm.29525          | 12.67        | 0.013745       |
| <i>Zfp60</i>    | NM_009560              | Mm.66913          | 62.31        | 0.014712       |
| <i>Zfp654</i>   | BC027760               | Mm.25960          | 10.32        | 3.89E-05       |
| <i>Zfp664</i>   | BE980596               | Mm.138617         | 5.17         | 0.01194        |
| <i>Zfp667</i>   | BF467246               | Mm.276279         | 3.08         | 0.024185       |
| <i>Zfp710</i>   | AK017247               | Mm.290925         | 15.04        | 0.026793       |
| <i>Zfp844</i>   | NM_023266              | Mm.478044         | 36.76        | 0.018472       |
| <i>Zfp93</i>    | NM_018791              | Mm.459431         | 17.11        | 0.004769       |
| <i>Zhx3</i>     | BB795614               | Mm.471766         | 21.32        | 0.001546       |
| <i>Zkscan16</i> | BQ175781               | Mm.463942         | 30.29        | 0.002963       |
| <i>Zkscan5</i>  | U62907                 | Mm.332842         | 15.6         | 0.029968       |
| <i>Zkscan6</i>  | NM_026107              | Mm.340052         | 6.62         | 0.000836       |
| <i>Zscan21</i>  | AI326272               | Mm.2760           | 21.3         | 0.004807       |

SUPPLEMENTARY TABLE S4. CROSS-SPECIFIC PUTATIVE CANDIDATE OOCYTE REPROGRAMMING FACTORS (CORFs)

| CORF | Gene (aka)      | Fold change in expression <sup>a</sup><br>compared to fibroblasts in: |                |               | Function                                                                                                                                                                                                                                                                                                                                                                                                                                                                                                                                                                                                                                                                                                                                                                                                                                                                                                                                                                                                                   | Ref. |
|------|-----------------|-----------------------------------------------------------------------|----------------|---------------|----------------------------------------------------------------------------------------------------------------------------------------------------------------------------------------------------------------------------------------------------------------------------------------------------------------------------------------------------------------------------------------------------------------------------------------------------------------------------------------------------------------------------------------------------------------------------------------------------------------------------------------------------------------------------------------------------------------------------------------------------------------------------------------------------------------------------------------------------------------------------------------------------------------------------------------------------------------------------------------------------------------------------|------|
|      |                 | Human oocytes                                                         | Rhesus oocytes | Mouse oocytes |                                                                                                                                                                                                                                                                                                                                                                                                                                                                                                                                                                                                                                                                                                                                                                                                                                                                                                                                                                                                                            |      |
| 1    | AFAP1L2 (XB130) | 5.54                                                                  | 155.48         | 131.94        | Contributes to SRC-regulated transcriptional activation <sup>1</sup>                                                                                                                                                                                                                                                                                                                                                                                                                                                                                                                                                                                                                                                                                                                                                                                                                                                                                                                                                       | 1    |
| -    | AOF1 (KDM1B)    | 121.98                                                                | 11.93          | 20.51         | Histone H3K4 demethylase required to establish maternal genomic imprints in oocytes.                                                                                                                                                                                                                                                                                                                                                                                                                                                                                                                                                                                                                                                                                                                                                                                                                                                                                                                                       | 2, 3 |
| 2    | ARID2 (BAF200)  | 19.15                                                                 | 8.17           | 12.87         | Plays a key role in activating gene expression through the PBAF chromatin remodeling complex.                                                                                                                                                                                                                                                                                                                                                                                                                                                                                                                                                                                                                                                                                                                                                                                                                                                                                                                              | 4    |
| 3    | ASF1A (CIA)     | 6.57                                                                  | 16.75          | 4.82          | Histone chaperone that facilitates histone deposition and histone exchange and removal during nucleosome assembly and disassembly. Cooperates with chromatin assembly factor 1 (CAF-1) which plays a key role in remodeling chromatin in pluripotent embryonic cells <sup>5</sup>                                                                                                                                                                                                                                                                                                                                                                                                                                                                                                                                                                                                                                                                                                                                          | 2, 5 |
| 4    | ASF1B (CIA-II)  | 3.95                                                                  | 12.36          | 8.75          | Histone chaperone that facilitates histone deposition and histone exchange and removal during nucleosome assembly and disassembly. Cooperates with chromatin assembly factor 1 (CAF-1) which plays a key role in remodeling chromatin in pluripotent embryonic cells <sup>5</sup>                                                                                                                                                                                                                                                                                                                                                                                                                                                                                                                                                                                                                                                                                                                                          | 2, 5 |
| -    | ASXL1           | 13.26                                                                 | 13.58          | 9.6           | Involved in polycomb based repression; anti-transformative                                                                                                                                                                                                                                                                                                                                                                                                                                                                                                                                                                                                                                                                                                                                                                                                                                                                                                                                                                 | 2    |
| 5    | BRDT            | 7.6                                                                   | 123.68         | 284.62        | Role in the reorganization of acetylated chromatin in germ cells                                                                                                                                                                                                                                                                                                                                                                                                                                                                                                                                                                                                                                                                                                                                                                                                                                                                                                                                                           | 6    |
| -    | CAMTA1          | 5.01                                                                  | 44.96          | 40.05         | Tumor suppressor than inhibits proliferation and induces differentiation                                                                                                                                                                                                                                                                                                                                                                                                                                                                                                                                                                                                                                                                                                                                                                                                                                                                                                                                                   | 7    |
| -    | CNOT6L          | 14.69                                                                 | 30.12          | 21.09         | Involved in degradation of mRNA                                                                                                                                                                                                                                                                                                                                                                                                                                                                                                                                                                                                                                                                                                                                                                                                                                                                                                                                                                                            |      |
| -    | DNMT1           | 12.69                                                                 | 12.89          | 11.03         | Maintains DNA methylation                                                                                                                                                                                                                                                                                                                                                                                                                                                                                                                                                                                                                                                                                                                                                                                                                                                                                                                                                                                                  |      |
| 6    | DPPA3           | 369.73                                                                | 654.65         | 112.33        | Critical component involved with altering chromatin structure in the oocyte                                                                                                                                                                                                                                                                                                                                                                                                                                                                                                                                                                                                                                                                                                                                                                                                                                                                                                                                                | 8    |
| 7    | DPPA5           | 457.32                                                                | 235            | 3.32          | Pluripotency associated factor                                                                                                                                                                                                                                                                                                                                                                                                                                                                                                                                                                                                                                                                                                                                                                                                                                                                                                                                                                                             | 9    |
| 8    | ERG             | 6.63                                                                  | 65.6           | 119.46        | Transformation-specific transcriptions factors that promotes and maintains leukemia                                                                                                                                                                                                                                                                                                                                                                                                                                                                                                                                                                                                                                                                                                                                                                                                                                                                                                                                        | 10   |
| 9    | FOXK2           | 14.4                                                                  | 6.53           | 4.49          | Promotes activation protein-1 (AP-1)-mediated transcriptional regulation throughout genome                                                                                                                                                                                                                                                                                                                                                                                                                                                                                                                                                                                                                                                                                                                                                                                                                                                                                                                                 | 11   |
| -    | FOXO3           | 6.97                                                                  | 4.84           | 11.58         | Tumor suppressor that suppresses MYC                                                                                                                                                                                                                                                                                                                                                                                                                                                                                                                                                                                                                                                                                                                                                                                                                                                                                                                                                                                       | 12   |
| -    | GATA4           | 4.65                                                                  | 23.02          | 4.22          | Induces differentiation towards extraembryonic endoderm                                                                                                                                                                                                                                                                                                                                                                                                                                                                                                                                                                                                                                                                                                                                                                                                                                                                                                                                                                    | 13   |
| -    | GTF2B           | 10.48                                                                 | 6.8            | 12.39         | Component of basal transcription complex                                                                                                                                                                                                                                                                                                                                                                                                                                                                                                                                                                                                                                                                                                                                                                                                                                                                                                                                                                                   | 2    |
| 10   | H1FOO           | 318.44                                                                | 18.04          | 482.95        | The somatic type linker histone H1c is rapidly replaced by H1oo in a donor nucleus transplanted into an oocyte. The greater mobility of H1oo as compared to H1c may contribute to this rapid replacement and increased instability of the embryonic chromatin structure. The rapid replacement of H1c with H1oo may play an important role in nuclear remodeling. The higher-order structure of chromatin <i>in vivo</i> is critically dependent on architectural chromatin proteins, with the family of linker histone proteins among the most critical structural determinants. Although somatic cells contain numerous linker histone variants, only one, H1FOO, is present in oocytes. Upon fertilization, H1FOO rapidly populates the introduced paternal genome and replaces sperm-specific histone-like proteins. The same dynamic replacement occurs upon introduction of a nucleus during somatic cell nuclear transfer. Although both histones associate readily with chromatin in nuclei of somatic cells, only | 14   |

(continued)

SUPPLEMENTARY TABLE S4. (CONTINUED)

| CORF | Gene (aka)           | Fold change in expression <sup>a</sup><br>compared to fibroblasts in: |                |               | Function                                                                                                                                                                                                                                                                                                                                                                                                                                                                                                                                                                                                                                                                                                                 | Ref. |
|------|----------------------|-----------------------------------------------------------------------|----------------|---------------|--------------------------------------------------------------------------------------------------------------------------------------------------------------------------------------------------------------------------------------------------------------------------------------------------------------------------------------------------------------------------------------------------------------------------------------------------------------------------------------------------------------------------------------------------------------------------------------------------------------------------------------------------------------------------------------------------------------------------|------|
|      |                      | Human oocytes                                                         | Rhesus oocytes | Mouse oocytes |                                                                                                                                                                                                                                                                                                                                                                                                                                                                                                                                                                                                                                                                                                                          |      |
| 11   | <i>HHEX</i>          | 40.15                                                                 | 193.39         | 7.38          | H1FOO is capable of correct chromatin association in oocyte nuclei.<br>Transcription factor important for embryonic development                                                                                                                                                                                                                                                                                                                                                                                                                                                                                                                                                                                          | 2    |
| -    | <i>HIC2</i>          | 7.7                                                                   | 8.86           | 17.58         | Transcriptional repressor                                                                                                                                                                                                                                                                                                                                                                                                                                                                                                                                                                                                                                                                                                | 2    |
| -    | <i>HSF2BP</i>        | 87.35                                                                 | 1832.78        | 34.03         | Modulates heat shock factor (HSF)2 activation                                                                                                                                                                                                                                                                                                                                                                                                                                                                                                                                                                                                                                                                            | 2    |
| 12   | <i>ING3</i>          | 10.72                                                                 | 14.08          | 13.21         | Component of the NuA4 histone acetyltransferase (HAT) complex, which is involved in transcriptional activation of select genes principally by acetylation of nucleosomal histones H4 and H2A. This modification may both alter nucleosome-DNA interactions and promote interaction of the modified histones with other proteins which positively regulate transcription. This complex may be required for the activation of transcriptional programs associated with oncogene and proto-oncogene-mediated growth induction.                                                                                                                                                                                              | 2    |
| -    | <i>IRF8</i>          | 58.99                                                                 | 644.49         | 20.13         | Modulates expression of IFN-alpha and IFN-beta-regulated genes                                                                                                                                                                                                                                                                                                                                                                                                                                                                                                                                                                                                                                                           | 2    |
| 13   | <i>KDM6B</i>         | 20.85                                                                 | 10.42          | 16.75         | Histone demethylase that specifically demethylates 'Lys-27' of histone H3. Polycomb group (PcG) proteins complex PRC1 recognizes methyl-H3K27 to form repressive chromatin. Therefore KDM6B removes repressive chromatin and opening up chromatin for reprogramming.                                                                                                                                                                                                                                                                                                                                                                                                                                                     | 15   |
| -    | <i>KLF11 (TIEG2)</i> | 5.96                                                                  | 38.39          | 3.35          | Transcription factor. Represses promoters containing SP1-like binding inhibiting cell growth. Represses transcription of SMAD7, which enhances TGF-beta signaling. Induces apoptosis.                                                                                                                                                                                                                                                                                                                                                                                                                                                                                                                                    | 2    |
| 14   | <i>LEF1</i>          | 60.54                                                                 | 45.27          | 6.91          | Transcriptionally activates MYC and CCND1 expression and enhances cell proliferation                                                                                                                                                                                                                                                                                                                                                                                                                                                                                                                                                                                                                                     | 2    |
| -    | <i>LHX8</i>          | 132.4                                                                 | 13             | 25.91         | Involved in differentiation                                                                                                                                                                                                                                                                                                                                                                                                                                                                                                                                                                                                                                                                                              | 16   |
| -    | <i>LRCH4</i>         | 3.86                                                                  | 8.29           | 37.06         | Regulator of the innate immune response                                                                                                                                                                                                                                                                                                                                                                                                                                                                                                                                                                                                                                                                                  | 2    |
| -    | <i>MAEL</i>          | 218.11                                                                | 206.2          | 81.61         | Represses transposable elements in the germline                                                                                                                                                                                                                                                                                                                                                                                                                                                                                                                                                                                                                                                                          | 2    |
| -    | <i>MED8</i>          | 13.17                                                                 | 5.67           | 4.24          | Component of the general transcriptional mediator complex                                                                                                                                                                                                                                                                                                                                                                                                                                                                                                                                                                                                                                                                | 2    |
| 15   | <i>MLL3</i>          | 20.92                                                                 | 31.27          | 40.95         | Methylates 'Lys-4' of histone H3. H3 'Lys-4' methylation represents a specific tag for epigenetic transcriptional activation. Essential in maintaining hematopoietic stem cell state.                                                                                                                                                                                                                                                                                                                                                                                                                                                                                                                                    | 17   |
| 16   | <i>MSL3</i>          | 4.41                                                                  | 56.46          | 7.2           | Component of the MSL complex, which is responsible for the majority of histone H4 acetylation at 'Lys-16' implicated in the formation of higher-order chromatin structure. The incorporation of this modified histone into nucleosomal arrays inhibits the formation of compact 30-nanometer-like fibers and impedes the ability of chromatin to form cross-fiber interactions. H4-K16Ac also inhibits the ability of the adenosine triphosphate-utilizing chromatin assembly and remodeling enzyme ACF to mobilize a mononucleosome, indicating that this single histone modification modulates both higher-order chromatin structure and functional interactions between a nonhistone protein and the chromatin fiber. | 18   |
| 17   | <i>NCOA3</i>         | 4.48                                                                  | 9.17           | 16.16         | Nuclear receptor coactivator that directly binds nuclear receptors and stimulates the transcriptional activities in a hormone-dependent fashion. Plays a central role in creating a multisubunit coactivator                                                                                                                                                                                                                                                                                                                                                                                                                                                                                                             | 2    |

(continued)

SUPPLEMENTARY TABLE S4. (CONTINUED)

| CORF | Gene (aka) | Fold change in expression <sup>a</sup><br>compared to fibroblasts in: |                |               | Function                                                                                                                                                                                                                                                                                                                                                                                                   | Ref. |
|------|------------|-----------------------------------------------------------------------|----------------|---------------|------------------------------------------------------------------------------------------------------------------------------------------------------------------------------------------------------------------------------------------------------------------------------------------------------------------------------------------------------------------------------------------------------------|------|
|      |            | Human oocytes                                                         | Rhesus oocytes | Mouse oocytes |                                                                                                                                                                                                                                                                                                                                                                                                            |      |
|      |            |                                                                       |                |               | complex, which probably acts via remodeling of chromatin. Involved in the coactivation of different nuclear receptors, such as for steroids (GR and ER), retinoids (RARs and RXRs), thyroid hormone (TRs), vitamin D3 (VDR), and prostanoids (PPARs). Displays HAT activity. Also involved in the coactivation of the NF-kappa-B pathway via its interaction with the NFKB1 subunit. Interacts with PSMB9. |      |
| 18   | NFATC2     | 10.37                                                                 | 39.05          | 8.09          | Induces lymphocyte proliferation                                                                                                                                                                                                                                                                                                                                                                           | 19   |
| -    | NFYC       | 4.13                                                                  | 5.93           | 3.21          | Corepressor of agonist-bound mineralocorticoid receptor                                                                                                                                                                                                                                                                                                                                                    | 20   |
| 19   | NR5A2      | 3.58                                                                  | 94.22          | 26.31         | Transcription factor that can replace OCT4 in reprogramming                                                                                                                                                                                                                                                                                                                                                | 21   |
| -    | PIAS4      | 3.53                                                                  | 29.07          | 5.9           | Involved in gene silencing                                                                                                                                                                                                                                                                                                                                                                                 | 2    |
| 20   | POU4F1     | 12.75                                                                 | 251.56         | 143.01        | Transcription factor associated with cancer (acute myeloid leukemia)                                                                                                                                                                                                                                                                                                                                       | 22   |
| 21   | RPS6KA5    | 9.6                                                                   | 89.46          | 8.44          | Contributes to gene activation by histone phosphorylation                                                                                                                                                                                                                                                                                                                                                  | 2    |
| -    | RUNX1T1    | 48.56                                                                 | 18.25          | 13.89         | Facilitate transcriptional repression.                                                                                                                                                                                                                                                                                                                                                                     | 2    |
| -    | SAP30      | 7.3                                                                   | 6.63           | 40.45         | Capable of transcription repression by N-CoR. Active in deacetylating core histone octamers (when in a complex) but inactive in deacetylating nucleosomal histones                                                                                                                                                                                                                                         | 2    |
| -    | SIN3A      | 7.21                                                                  | 30.13          | 42.43         | Transcriptional repressor.                                                                                                                                                                                                                                                                                                                                                                                 | 2    |
| 22   | TADA2L     | 5.32                                                                  | 4.69           | 3.08          | Component of the ATAC complex, a complex with HAT activity on histones H3 and H4.                                                                                                                                                                                                                                                                                                                          | 2    |
| 23   | TAF4B      | 21.2                                                                  | 9.19           | 4.18          | Function as a gene-selective coactivator in certain cells and is involved in the activation of antiapoptotic genes                                                                                                                                                                                                                                                                                         | 2    |
| -    | TAF5       | 15.13                                                                 | 20.55          | 21.08         | Component of transcription factor IID (TFIID) complex                                                                                                                                                                                                                                                                                                                                                      | 2    |
| -    | UHRF1      | 22.1                                                                  | 4.74           | 8.43          | Links the histone code and DNA methylation to ensure faithful epigenetic memory inheritance                                                                                                                                                                                                                                                                                                                | 23   |
| -    | USP2       | 22.28                                                                 | 514.28         | 37.1          | Involved in myogenic differentiation                                                                                                                                                                                                                                                                                                                                                                       | 2    |
| -    | WAPAL      | 4.73                                                                  | 5.08           | 5.76          | Regulator of sister chromatid cohesion in mitosis                                                                                                                                                                                                                                                                                                                                                          | 2    |

<sup>a</sup>All fold changes in gene expression represented a statistically significant ( $p$  less than sign 0.05) three-fold or greater increase in detected gene expression in the relevant species metaphase II oocytes compared to their adult dermal fibroblasts.



## Supplementary References

1. Xu, J., et al. (2007). XB130, a novel adaptor protein for signal transduction. *J. Biol. Chem.* 282, 16401–16412.
2. The GeneCards Human Gene Database. 2012. Available at [www.genecards.org/](http://www.genecards.org/)
3. Ciccone, D.N., et al. (2009). KDM1B is a histone H3K4 demethylase required to establish maternal genomic imprints. *Nature* 461, 415–418.
4. Xu, F., Flowers, S., and Moran, E. (2012). Essential role of ARID2 protein-containing SWI/SNF complex in tissue-specific gene expression. *J. Biol. Chem.* 287, 5033–5041.
5. Houlard, M., et al. (2006). CAF-1 is essential for heterochromatin organization in pluripotent embryonic cells. *PLoS Genet.* 2, e181.
6. Pivot-Pajot, C., et al. (2003). Acetylation-dependent chromatin reorganization by BRDT, a testis-specific bromodomain-containing protein. *Mol. Cell. Biol.* 23, 5354–5365.
7. Henrich, K.O., et al. (2011). CAMTA1, a 1p36 tumor suppressor candidate, inhibits growth and activates differentiation programs in neuroblastoma cells. *Cancer Res.* 71, 3142–3151.
8. Liu, Y.J., Nakamura, T., and Nakano, T. (2012). Essential role of DPPA3 for chromatin condensation in mouse oocytogenesis. *Biol. Reprod.* 86, 40.
9. Kim, S.K., et al. (2005). Identification of developmental pluripotency associated 5 expression in human pluripotent stem cells. *Stem Cells* 23, 458–462.
10. Tsuzuki, S., Taguchi, O., and Seto, M. (2011). Promotion and maintenance of leukemia by ERG. *Blood* 117, 3858–3868.
11. Ji, Z., et al. (2012). The forkhead transcription factor FOXK2 promotes AP-1-mediated transcriptional regulation. *Mol. Cell. Biol.* 32, 385–398.
12. Bouchard, C., et al. (2007). FoxO transcription factors suppress Myc-driven lymphomagenesis via direct activation of Arf. *Genes Dev.* 21, 2775–2787.
13. Fujikura, J., et al. (2002). Differentiation of embryonic stem cells is induced by GATA factors. *Genes Dev.* 16, 784–789.
14. Becker, M., et al. (2005). Differential in vivo binding dynamics of somatic and oocyte-specific linker histones in oocytes and during ES cell nuclear transfer. *Mol. Biol. Cell* 16, 3887–3895.
15. Aoto, T., et al. (2008). Polycomb group protein-associated chromatin is reproduced in post-mitotic G1 phase and is required for S phase progression. *J. Biol. Chem.* 283, 18905–18915.
16. Manabe, T., et al. (2007). L3/Lhx8 is a pivotal factor for cholinergic differentiation of murine embryonic stem cells. *Cell Death Differ.* 14, 1080–1085.
17. Jude, C.D., et al. (2007). Unique and independent roles for MLL in adult hematopoietic stem cells and progenitors. *Cell Stem Cell* 1, 324–337.
18. Shogren-Knaak, M., et al. (2006). Histone H4-K16 acetylation controls chromatin structure and protein interactions. *Science* 311, 844–847.
19. Caetano, M.S., et al. (2002). NFATC2 transcription factor regulates cell cycle progression during lymphocyte activation: Evidence of its involvement in the control of cyclin gene expression. *FASEB J.* 16, 1940–1942.
20. Murai-Takeda, A., et al. (2010). NF-YC functions as a corepressor of agonist-bound mineralocorticoid receptor. *J. Biol. Chem.* 285, 8084–8093.
21. Heng, J.C., et al. (2010). The nuclear receptor Nr5a2 can replace Oct4 in the reprogramming of murine somatic cells to pluripotent cells. *Cell Stem Cell* 6, 167–174.
22. Fortier, J.M., et al. (2010). POU4F1 is associated with t(8;21) acute myeloid leukemia and contributes directly to its unique transcriptional signature. *Leukemia* 24, 950–957.
23. Uekawa, A., et al. (2009). Change of epigenetic control of cystathionine beta-synthase gene expression through dietary vitamin B12 is not recovered by methionine supplementation. *J. Nutrigenet. Nutrigenomics.* 2, 29–36.
